# Supplementary material for: Improved bacterial leaf blight disease resistance in the major elite Vietnamese rice cultivar TBR225 via editing of the OsSWEET14 promoter
Source: PubMed Central journal article supplement (PMC8428762; doi:10.1371/journal.pone.0255470), 2021-09-09
Supplement: pone.0255470.s013.pdf [file pone.0255470.s013.pdf]

# PLOS ONE

## Improved bacterial leaf blight disease resistance in the major elite Vietnamese rice cultivar TBR225 via editing of the OsSWEET14 promoter

--Manuscript Draft--

|                                |                                                                                                                                                                                                                                                                                                                                                                                                                                                                                                                                                                                                                                                                                                                                                                                                                                                                                                                                                                                                                                                                                                                                                                                                                                                                                                                                                                                                                                                                                                                                                                                                                                                                                |
|--------------------------------|--------------------------------------------------------------------------------------------------------------------------------------------------------------------------------------------------------------------------------------------------------------------------------------------------------------------------------------------------------------------------------------------------------------------------------------------------------------------------------------------------------------------------------------------------------------------------------------------------------------------------------------------------------------------------------------------------------------------------------------------------------------------------------------------------------------------------------------------------------------------------------------------------------------------------------------------------------------------------------------------------------------------------------------------------------------------------------------------------------------------------------------------------------------------------------------------------------------------------------------------------------------------------------------------------------------------------------------------------------------------------------------------------------------------------------------------------------------------------------------------------------------------------------------------------------------------------------------------------------------------------------------------------------------------------------|
| <b>Manuscript Number:</b>      | PONE-D-20-33201R2                                                                                                                                                                                                                                                                                                                                                                                                                                                                                                                                                                                                                                                                                                                                                                                                                                                                                                                                                                                                                                                                                                                                                                                                                                                                                                                                                                                                                                                                                                                                                                                                                                                              |
| <b>Article Type:</b>           | Research Article                                                                                                                                                                                                                                                                                                                                                                                                                                                                                                                                                                                                                                                                                                                                                                                                                                                                                                                                                                                                                                                                                                                                                                                                                                                                                                                                                                                                                                                                                                                                                                                                                                                               |
| <b>Full Title:</b>             | Improved bacterial leaf blight disease resistance in the major elite Vietnamese rice cultivar TBR225 via editing of the OsSWEET14 promoter                                                                                                                                                                                                                                                                                                                                                                                                                                                                                                                                                                                                                                                                                                                                                                                                                                                                                                                                                                                                                                                                                                                                                                                                                                                                                                                                                                                                                                                                                                                                     |
| <b>Short Title:</b>            | Improved bacterial leaf blight disease resistance in Vietnamese rice cultivar TBR225                                                                                                                                                                                                                                                                                                                                                                                                                                                                                                                                                                                                                                                                                                                                                                                                                                                                                                                                                                                                                                                                                                                                                                                                                                                                                                                                                                                                                                                                                                                                                                                           |
| <b>Corresponding Author:</b>   | Hoi Xuan Pham, Ph.D.<br>Institute of Agricultural Genetics<br>Hanoi, VIET NAM                                                                                                                                                                                                                                                                                                                                                                                                                                                                                                                                                                                                                                                                                                                                                                                                                                                                                                                                                                                                                                                                                                                                                                                                                                                                                                                                                                                                                                                                                                                                                                                                  |
| <b>Keywords:</b>               | Bacterial leaf blight; CRISPR/Cas9; <i>Xanthomonas oryzae</i> pv. <i>oryzae</i> ; OsSWEET14; TBR225; transgene-free plants.                                                                                                                                                                                                                                                                                                                                                                                                                                                                                                                                                                                                                                                                                                                                                                                                                                                                                                                                                                                                                                                                                                                                                                                                                                                                                                                                                                                                                                                                                                                                                    |
| <b>Abstract:</b>               | TBR225 is one of the most popular commercial rice varieties in Northern Vietnam. However, this variety is very susceptible to bacterial leaf blight (BLB), a disease caused by <i>Xanthomonas oryzae</i> pv. <i>oryzae</i> (Xoo) which inflicts important yield losses. OsSWEET14 belongs to the SWEET gene family that encodes sugar transporters. Together with other Clade III members, it behaves as a susceptibility (S) gene whose induction by Asian Xoo Transcription-Activator-Like Effectors (TALEs) is absolutely necessary for disease. In this study, we sought to introduce BLB resistance in the TBR225 elite variety. First, two Vietnamese Xoo strains were shown to up-regulate OsSWEET14 upon TBR225 infection. To investigate if this induction is connected with disease susceptibility, nine TBR225 mutant lines with mutations in the AvrXa7, PthXo3 or TalF TALEs DNA target sequences of the OsSWEET14 promoter were obtained using the CRISPR/Cas9 editing system. Genotyping analysis of T <sub>0</sub> and T <sub>1</sub> individuals showed that mutations were stably inherited. None of the examined agronomic traits of three transgene-free T <sub>2</sub> edited lines were significantly different from those of wild-type TBR225. Importantly, one of these T <sub>2</sub> lines, harboring the largest homozygous 6-bp deletion, displayed decreased OsSWEET14 expression as well as a significantly reduced susceptibility to a Vietnamese Xoo strains and complete resistance to the other one. Our finding indicated that CRISPR/Cas9 is a useful and effective approach to improve BLB resistance of commercial elite rice varieties. |
| <b>Order of Authors:</b>       | Phuong Duy Nguyen<br>Dai Lan Tran<br>Hang Thu Pham<br>Phung Thi Thu Huong<br>Ha Thanh Nguyen<br>Ngoc Phuong Pham<br>Florence Auguy<br>Huong Thi Thu Bui<br>Bao Manh Tran<br>Sebastien Cunnac<br>Hoi Xuan Pham, Ph.D.                                                                                                                                                                                                                                                                                                                                                                                                                                                                                                                                                                                                                                                                                                                                                                                                                                                                                                                                                                                                                                                                                                                                                                                                                                                                                                                                                                                                                                                           |
| <b>Response to Reviewers:</b>  | We would like to thank you for your time and efforts handling and assessing our work. We hope our modifications of the initial manuscript address the concerns raised by the journal and reviewers.                                                                                                                                                                                                                                                                                                                                                                                                                                                                                                                                                                                                                                                                                                                                                                                                                                                                                                                                                                                                                                                                                                                                                                                                                                                                                                                                                                                                                                                                            |
| <b>Additional Information:</b> |                                                                                                                                                                                                                                                                                                                                                                                                                                                                                                                                                                                                                                                                                                                                                                                                                                                                                                                                                                                                                                                                                                                                                                                                                                                                                                                                                                                                                                                                                                                                                                                                                                                                                |

| Question                                                                                                                                                                                                                                                                                                                                                                                                                                                                                                                                                                                                                                                                                                                                                                                                                                                                                                                                                                                                                                                                                                                                                                                                                                                                                                                                                                            | Response                                                                                                                                                                                                                                                                                                                                                                                                                                  |
|-------------------------------------------------------------------------------------------------------------------------------------------------------------------------------------------------------------------------------------------------------------------------------------------------------------------------------------------------------------------------------------------------------------------------------------------------------------------------------------------------------------------------------------------------------------------------------------------------------------------------------------------------------------------------------------------------------------------------------------------------------------------------------------------------------------------------------------------------------------------------------------------------------------------------------------------------------------------------------------------------------------------------------------------------------------------------------------------------------------------------------------------------------------------------------------------------------------------------------------------------------------------------------------------------------------------------------------------------------------------------------------|-------------------------------------------------------------------------------------------------------------------------------------------------------------------------------------------------------------------------------------------------------------------------------------------------------------------------------------------------------------------------------------------------------------------------------------------|
| <p><b>Financial Disclosure</b></p> <p>Enter a financial disclosure statement that describes the sources of funding for the work included in this submission. Review the <a href="#">submission guidelines</a> for detailed requirements. View published research articles from <a href="#">PLOS ONE</a> for specific examples.</p> <p>This statement is required for submission and <b>will appear in the published article</b> if the submission is accepted. Please make sure it is accurate.</p> <p><b>Unfunded studies</b><br/>Enter: <i>The author(s) received no specific funding for this work.</i></p> <p><b>Funded studies</b><br/>Enter a statement with the following details:</p> <ul style="list-style-type: none"> <li>• Initials of the authors who received each award</li> <li>• Grant numbers awarded to each author</li> <li>• The full name of each funder</li> <li>• URL of each funder website</li> <li>• Did the sponsors or funders play any role in the study design, data collection and analysis, decision to publish, or preparation of the manuscript?</li> <li>• <b>NO</b> - Include this sentence at the end of your statement: <i>The funders had no role in study design, data collection and analysis, decision to publish, or preparation of the manuscript.</i></li> <li>• <b>YES</b> - Specify the role(s) played.</li> </ul> <p>* typeset</p> | <p>This work was supported by the National Technology Innovation Program of Vietnam (Grant No. ĐM.36.DN/18) funded by the Vietnam Ministry of Science and Technology (<a href="https://most.gov.vn/vn/pages/Trangchu.aspx">https://most.gov.vn/vn/pages/Trangchu.aspx</a>) and ThaiBinh Seed Corporation (<a href="https://thaibinhseed.com.vn/trang-chu.aspx?lang=en-US">https://thaibinhseed.com.vn/trang-chu.aspx?lang=en-US</a>).</p> |
| <p><b>Competing Interests</b></p> <p>Use the instructions below to enter a competing interest statement for this submission. On behalf of all authors, disclose any <a href="#">competing interests</a> that could be perceived to bias this work—acknowledging all financial support and any other relevant financial or non-financial competing interests.</p> <p>This statement <b>will appear in the published article</b> if the submission is</p>                                                                                                                                                                                                                                                                                                                                                                                                                                                                                                                                                                                                                                                                                                                                                                                                                                                                                                                             | <p>The authors have declared that no competing interests exist</p>                                                                                                                                                                                                                                                                                                                                                                        |

accepted. Please make sure it is accurate. View published research articles from [PLOS ONE](#) for specific examples.

**NO authors have competing interests**

Enter: *The authors have declared that no competing interests exist.*

**Authors with competing interests**

Enter competing interest details beginning with this statement:

*I have read the journal's policy and the authors of this manuscript have the following competing interests: [insert competing interests here]*

\* typeset

**Ethics Statement**

N/A

Enter an ethics statement for this submission. This statement is required if the study involved:

- Human participants
- Human specimens or tissue
- Vertebrate animals or cephalopods
- Vertebrate embryos or tissues
- Field research

Write "N/A" if the submission does not require an ethics statement.

General guidance is provided below. Consult the [submission guidelines](#) for detailed instructions. **Make sure that all information entered here is included in the Methods section of the manuscript.**

**Format for specific study types**

**Human Subject Research (involving human participants and/or tissue)**

- Give the name of the institutional review board or ethics committee that approved the study
- Include the approval number and/or a statement indicating approval of this research
- Indicate the form of consent obtained (written/oral) or the reason that consent was not obtained (e.g. the data were analyzed anonymously)

**Animal Research (involving vertebrate animals, embryos or tissues)**

- Provide the name of the Institutional Animal Care and Use Committee (IACUC) or other relevant ethics board that reviewed the study protocol, and indicate whether they approved this research or granted a formal waiver of ethical approval
- Include an approval number if one was obtained
- If the study involved *non-human primates*, add *additional details* about animal welfare and steps taken to ameliorate suffering
- If anesthesia, euthanasia, or any kind of animal sacrifice is part of the study, include briefly which substances and/or methods were applied

**Field Research**

Include the following details if this study involves the collection of plant, animal, or other materials from a natural setting:

- Field permit number
- Name of the institution or relevant body that granted permission

**Data Availability**

Authors are required to make all data underlying the findings described fully available, without restriction, and from the time of publication. PLOS allows rare exceptions to address legal and ethical concerns. See the [PLOS Data Policy](#) and [FAQ](#) for detailed information.

Yes - all data are fully available without restriction

A Data Availability Statement describing where the data can be found is required at submission. Your answers to this question constitute the Data Availability Statement and **will be published in the article**, if accepted.

**Important:** Stating 'data available on request from the author' is not sufficient. If your data are only available upon request, select 'No' for the first question and explain your exceptional situation in the text box.

Do the authors confirm that all data underlying the findings described in their manuscript are fully available without restriction?

**Describe where the data may be found in full sentences. If you are copying our sample text, replace any instances of XXX with the appropriate details.**

- If the data are **held or will be held in a public repository**, include URLs, accession numbers or DOIs. If this information will only be available after acceptance, indicate this by ticking the box below. For example: *All XXX files are available from the XXX database (accession number(s) XXX, XXX).*
- If the data are all contained **within the manuscript and/or Supporting Information files**, enter the following:  
*All relevant data are within the manuscript and its Supporting Information files.*
- If neither of these applies but you are able to provide **details of access elsewhere**, with or without limitations, please do so. For example:

*Data cannot be shared publicly because of [XXX]. Data are available from the XXX Institutional Data Access / Ethics Committee (contact via XXX) for researchers who meet the criteria for access to confidential data.*

*The data underlying the results presented in the study are available from (include the name of the third party*

All relevant data are within the manuscript and its Supporting Information files.

|                                                                                                                                                                                                                                           |                                                                                                                                                                                                                                                                                                                              |
|-------------------------------------------------------------------------------------------------------------------------------------------------------------------------------------------------------------------------------------------|------------------------------------------------------------------------------------------------------------------------------------------------------------------------------------------------------------------------------------------------------------------------------------------------------------------------------|
| <p><i>and contact information or URL).</i></p> <ul style="list-style-type: none"> <li>• This text is appropriate if the data are owned by a third party and authors do not have permission to share the data.</li> </ul> <p>* typeset</p> |                                                                                                                                                                                                                                                                                                                              |
| <p>Additional data availability information:</p>                                                                                                                                                                                          | <p>Tick here if the URLs/accession numbers/DOIs will be available only after acceptance of the manuscript for publication so that we can ensure their inclusion before publication.; Tick here if your circumstances are not covered by the questions above and you need the journal's help to make your data available.</p> |

1 **Full title:**

2 **Improved bacterial leaf blight disease resistance in the major elite Vietnamese**  
3 **rice cultivar TBR225 via editing of the *OsSWEET14* promoter**

4 **Short title:**

5 **Improved bacterial leaf blight disease resistance in Vietnamese rice cultivar**  
6 **TBR225**

7 **Nguyen Duy Phuong<sup>1¶</sup>, Tran Lan Dai<sup>1,2¶</sup>, Pham Thu Hang<sup>1</sup>, Phung Thi Thu Huong<sup>1</sup>,**  
8 **Nguyen Thanh Ha<sup>1</sup>, Pham Phuong Ngoc<sup>1,#a</sup>, Florence Auguy<sup>3</sup>, Bui Thi Thu Huong<sup>4</sup>, Tran**  
9 **Manh Bao<sup>5</sup>, Sebastien Cunnac<sup>3</sup>, Pham Xuan Hoi<sup>1\*</sup>**

10 *<sup>1</sup>Department of Molecular Pathology, Institute of Agricultural Genetics, Vietnam Academy of*  
11 *Agricultural Sciences, Hanoi, Vietnam.*

12 *<sup>2</sup>Department of Applied Biology and Agriculture, Faculty of Natural Sciences, Quynhon*  
13 *University, Quynhon, Vietnam.*

14 *<sup>3</sup>PHIM Plant Health Institute, Univ Montpellier, IRD, CIRAD, INRAE, Institut Agro,*  
15 *Montpellier, France.*

16 *<sup>4</sup>Vietnam National University of Agriculture, Hanoi, Vietnam.*

17 *<sup>5</sup>ThaiBinh Seed Corporation, Thaibinh, Vietnam.*

18 \* Corresponding author: xuanhoi.pham@gmail.com

19 ¶ These authors contributed equally to this work.

20 <sup>#a</sup> Current address: Faculty of Biology, Hanoi University of Sciences, Hanoi, Vietnam.



## 21 **Abstract**

22 TBR225 is one of the most popular commercial rice varieties in Northern Vietnam.  
23 However, this variety is very susceptible to bacterial leaf blight (BLB), a disease caused  
24 by *Xanthomonas oryzae* pv. *oryzae* (*Xoo*) which inflicts important yield losses.  
25 *OsSWEET14* belongs to the *SWEET* gene family that encodes sugar transporters.  
26 Together with other Clade III members, it behaves as a susceptibility (*S*) gene whose  
27 induction by Asian *Xoo* Transcription-Activator-Like Effectors (TALEs) is absolutely  
28 necessary for disease. In this study, we sought to introduce BLB resistance in the  
29 TBR225 elite variety. First, two Vietnamese *Xoo* strains were shown to up-regulate  
30 *OsSWEET14* upon TBR225 infection. To investigate if this induction is connected with  
31 disease susceptibility, nine TBR225 mutant lines with mutations in the AvrXa7, PthXo3  
32 or TalF TALEs DNA target sequences of the *OsSWEET14* promoter were obtained using  
33 the CRISPR/Cas9 editing system. Genotyping analysis of T<sub>0</sub> and T<sub>1</sub> individuals showed  
34 that mutations were stably inherited. None of the examined agronomic traits of three  
35 transgene-free T<sub>2</sub> edited lines were significantly different from those of wild-type  
36 TBR225. Importantly, one of these T<sub>2</sub> lines, harboring the largest homozygous 6-bp  
37 deletion, displayed decreased *OsSWEET14* expression as well as a significantly reduced  
38 susceptibility to a Vietnamese *Xoo* strains and complete resistance to the other one. Our  
39 finding indicated that CRISPR/Cas9 is a useful and effective approach to improve BLB  
40 resistance of commercial elite rice varieties.

41 ***Keywords: Bacterial leaf blight; CRISPR/Cas9; Xanthomonas oryzae pv. oryzae;***

42 ***OsSWEET14; TBR225; transgene-free plants.***

43

## 44 **Introduction**

45 Bacterial leaf blight (BLB) caused by *Xanthomonas oryzae* pv. *oryzae* (*Xoo*) is a major  
46 bacterial disease that causes 10%-20% annual reduction in rice production worldwide [1].  
47 The use of improved rice varieties resistant to *Xoo* is probably the most efficient,  
48 economical and environmentally-friendly way to control BLB.

49 The virulence of *Xoo* depends on the transcriptional activation of specific host disease-  
50 susceptibility (*S*) genes by a subgroup of bacterial type III effectors, called transcription  
51 activator-like effectors (TALEs) [2]. Upon translocation into the plant cell, TALEs bind  
52 to specific host nuclear gene promoter sequences termed Effector-Binding Elements  
53 (EBEs) and induce target gene expression to the benefit of the pathogen. The central  
54 repetitive domain of TALEs is responsible for DNA target sequence binding. DNA  
55 binding involves recognition principles that have been largely deciphered and applied to  
56 the computational prediction of TALEs target DNA sequences [3,4]. This and earlier  
57 work has fostered the identification of TALEs transcriptional targets in the rice genome  
58 and ultimately, of rice BLB *S* genes [2].

59 All *Xoo* strains recurrently target *S* genes belonging to the *SWEET* gene family and  
60 coding for transmembrane sugar exporter proteins [3]. The over accumulation of  
61 SWEETs due to TALE induction is presumed to provide an additional ration of  
62 apoplastic carbohydrates for full bacterial pathogen multiplication and disease expression  
63 [5]. Although all five rice clade III *SWEET* genes can function as *S* genes for bacterial

64 blight, only three, namely *OsSWEET11*, *OsSWEET13* and *OsSWEET14*, are known to be  
65 targeted by several unrelated TALEs in nature [6–11]. *OsSWEET11* is activated by  
66 PthXo1 [6], *OsSWEET13* is targeted by different variants of PthXo2 [11,12], while  
67 *OsSWEET14* is a target of multiple TAL effectors, including AvrXa7, PthXo3, TalC and  
68 TalF [7–9].

69 Previous studies established that rice resistance to *Xoo* resulting from "TALE-  
70 unresponsive" alleles can be conferred by natural DNA polymorphisms or targeted  
71 **editions in** EBEs located in *OsSWEET* genes promoters of rice germplasm accessions or  
72 engineered rice varieties, respectively [6,13–16]. For example, early resistance  
73 engineering work has used TALENs to individually alter the AvrXa7, TalC or TalF EBEs  
74 in the *OsSWEET14* promoter and successfully obtained resistance to some Asian *Xoo*  
75 strains [13,15]. However, strains collected in Asian countries such as China, Japan,  
76 Phillipines, Taiwan, Thailand, India, Nepal or South Korea can express combinations of  
77 up to three major TALEs redundantly targeting clade III *OsSWEET* genes with either  
78 PthXo3 or AvrXa7 being occasionally associated with PthXo2 [11,17]. Broad BLB  
79 resistance engineering thus required multiplex *OsSWEET* promoters EBE editing using  
80 the CRISPR/Cas9 system [11,12].

81 The clustered regularly interspaced short palindromic repeats/CRISPR-associated  
82 protein-9 nuclease (CRISPR/Cas9) system is a simple and efficient gene-editing tool  
83 developed in the past **few years**. Moreover, the targeted mutations generated by  
84 CRISPR/Cas9 can be stably transmitted to the next generation. Thus, CRISPR/Cas9 has

85 become a routine tool in plant laboratories around the world to create various mutants for  
86 many applications, including the genetic improvement of crops [18].

87 BLB is a major rice disease which occurs in many rice cultivating areas of Vietnam  
88 [19,20]. Most Vietnamese commercial rice varieties, including TBR225, are susceptible  
89 to BLB, resulting in annual yield loss of about 15 – 30% on average [21]. A few studies  
90 have identified rice resistance genes effective against Vietnamese *Xoo* lineages [20,21].  
91 However, no information is currently available on the nature of Vietnamese *Xoo* TALEs  
92 and their corresponding *S* genes. Despite the large number of mapped rice BLB resistance  
93 genes [22], there is a need for alternative breeding approaches that enable the rapid  
94 introduction of broad BLB resistance in elite varieties in order to cope with swift  
95 pathogen populations adaptive shifts in the fields [11,23].

96 Here, we report on the identification of *OsSWEET14* as a transcriptional target of  
97 Vietnamese *Xoo*. CRISPR/Cas9-mediated mutagenesis of the *OsSWEET14* promoter in  
98 TBR225, a major elite variety in rice production areas of North Vietnam is shown to  
99 confer BLB resistance without detectable yield penalty. This study found this  
100 quintessential *S* gene to be associated with the virulence of Vietnamese *Xoo* strains. This  
101 is an important step for the future design and implementation of broad-spectrum BLB-  
102 resistant in elite rice varieties using genome editing in Vietnam.

103

## 104 **Materials and methods**

## 105 **Plant and pathogen materials**

106 Rice cultivar TBR225 (*Oryza sativa* L. ssp. *indica*) were obtained from ThaiBinh Seed  
107 Cor. [24]. All edited and wild-type (WT) TBR225 plants were grown in a net-house  
108 under the following average conditions: 30°C for 14 h (light) and 25°C for 10 h (dark)  
109 with 80% humidity. The *Xoo* VXO\_11 and VXO\_15 strains used in this study were  
110 isolated from diseased leaves collected in Hanoi-Vietnam in 2013 and 2016, respectively.  
111 Bacteria were cultured as described in Zhou et al. (2015) [25].

## 112 **Gene expression analysis**

113 Gene expression analyses were carried out as described previously [26] by RT-PCR  
114 method. The rice leaves were infiltrated with the indicated bacterial strains and used for  
115 total RNA extraction 48 h post inoculation using the TRIzol reagent (Invitrogen, USA).  
116 One microgram of RNA was used for each RT-PCR with oligo (dT) primer followed by  
117 PCR with *OsSWEET14*-specific primers (forward 5'-  
118 ACTTGCAAGCAAGAACAGTAGT-3' and reverse 5'-  
119 ATGTTGCCTAGGAGACCAAAGG-3'). An *Eppendorf Mastercycler ep Gradient S* was  
120 used for 35 PCR cycles. The *OsEF1α* gene was used as a constitutive control [15] using  
121 specific primers (forward 5'-GAAGTCTCATCCTACCTGAAGAAG-3' and reverse 5'-  
122 GTCAAGAGCCTCAAGCAAGG-3').

## 123 **gRNA design**

124 The *OsSWEET14* promoter (GenBank, accession number: AP014967.1) was amplified by  
125 PCR with forward primer 5'-TTGCGGCTCATCAGTTTCTC-3' and reverse primer 5'-  
126 CTAGGAGACCAAAGGCGAAG-3' from genomic DNA of TBR225 rice plants and  
127 ligated in pGEM-T Easy vector (Promega) for sequencing. The gRNA target sequence  
128 (Fig 1A) for editing the TBR225 *OsSWEET14* promoter was designed based on the  
129 sequence of the cloned TBR225 *OsSWEET14* promoter using a combination of two  
130 bioinformatics tools CRISPR-P v2.0 (<http://crispr.hzau.edu.cn/CRISPR2/>) and CCTop  
131 (<https://crispr.cos.uni-heidelberg.de/>). A gRNA sequence with high on-target and low off-  
132 target scores in both prediction tools was chosen for vector construction.

133

134 **Fig 1. CRISPR/Cas9-induced *OsSWEET14* promoter modification in TBR225 rice.**

135 (A) A region of the *OsSWEET14* promoter containing four EBEs (TalC, PthXo3, AvrXa7  
136 and TalF) and putative TATA box from TBR225. The target site (complementary to the  
137 guide RNA) is shown in the box, immediately following the protospacer adjacent motif  
138 (PAM). (B) T-DNA region of the CRISPR/Cas9-mediated genome editing construct  
139 carrying *OsSWEET14*-sgRNA (indicated by the black box). The expression of *Cas9* is  
140 driven by the maize *ubiquitin* promoter (P-Ubi); the expression of the *OsSWEET14*-  
141 sgRNA is driven by the rice *OsU6* promoter (P-*OsU6a*); the expression of *HPT* is driven  
142 by two *CaMV35S* promoters (P-2×35S); T-35S, T-Nos and TTTTTT: gene terminators;  
143 LB and RB: left and right border, respectively. (C) Alignment of the *OsSWEET14*  
144 promoter fragment in the nine T<sub>0</sub> transgenic TBR225 rice plants edited in the AvrXa7,

145 PthXo3 and TalF EBEs. The lines on top of the wild-type sequence represent the binding  
146 sites of AvrXa7, PthXo3 and TalF. The arrow indicates the expected cutting site of the  
147 Cas9 complex used in this study. The labels on the left indicate the name of examined  
148 mutant lines; (a1) and (a2) distinguish alleles in the same line. The numbers on the right  
149 indicate the type of mutation and the number of nucleotides involved; (+) and (-) indicate  
150 insertion and deletion, respectively.

151

## 152 **Vector construction**

153 The Cas9 rice expression vector (pUbi-Cas9) [27] and the sgRNA expression vector  
154 (pENTR-sgRNA) under the control of the *OsU6* promoter [28] were used to construct the  
155 pCas9/OsSWEET14-gRNA expression vector. The complementary oligonucleotides with  
156 appropriate 4-bp overhangs were synthesized by Macrogen (Korea). After heat  
157 denaturation, the complementary oligonucleotides (5'-  
158 gtgtGGTGCTAAGCTCATCAAGCC-3' and 5'-aacGGCTTGATGAGCTTAGCACC-  
159 3') were first annealed to each other, phosphorylated, and ligated into the *BsaI*-digested  
160 vector pENTR-sgRNA. The integrity of the inserted fragment was verified by  
161 sequencing. Subsequently, the sgRNA cassette was cloned into pUbi-Cas9 using the  
162 Gateway LR clonase (Life Technologies) (Fig 1B). The resulting construct was  
163 confirmed by Sanger sequencing of the insertion junctions.

164



## 165 ***Agrobacterium*-mediated rice transformation**

166 The pCas9-OsSWEET14-gRNA was electroporated into *Agrobacterium tumefaciens*  
167 EHA105 and the resulting strain was used to transform rice using the method described  
168 by Hiei et al. (1994) [29]. The presence of the transgene in the genome of T<sub>0</sub>  
169 hygromycin-resistant plants or segregating T<sub>1</sub> individuals was evaluated by PCR using 5'-  
170 ATGGCCCCAAAGAAGAAG-3' and 5'- GCCTCGGCTGTCTCGCCA-3' primers  
171 specific for *Cas9*. T<sub>1</sub> individuals were analyzed by PCR using *Cas9*, *OsSWEET14-gRNA*  
172 (5'- GGATCATGAACCAACG-3' and 5'- GAATTCGATATCAAGCTT-3') and *HPT*  
173 (5'-AAACTGTGATGGACGACACCGT-3' and 5'- GTGGCGATCCTGCAAGCTCC -  
174 3') specific diagnostic primer pairs together with a positive control pair (5'-  
175 TTGCGGCTCATCAGTTTCTC-3' and 5'- TGGATCAGATCAAAGGCAAC -3')  
176 specific to the *OsSWEET14* promoter.

177

## 178 **Bacterial blight inoculation**

179 Rice cultivation and disease assays were done according to the methods of Blanvillain-  
180 Baufumé et al. (2017) [15]. Bacteria were cultured in PSA media (10 g/liter peptone, 10  
181 g/liter sucrose, 1 g/liter glutamic acid, 15 g/liter Bacto Agar) at 28°C for two days [30]  
182 and inoculated at an optical density (OD<sub>600</sub>) of 0.5 (infiltrations) or 0.4 (leaf clipping) in  
183 water. For lesion length measurements, at least three inoculated leaves per plant and three  
184 plants for each line were measured 14 days after inoculation (DAI), and scored as

185 follows: high resistance (lesion length < 8 cm), moderate resistance (lesion length 8-12  
186 cm) and susceptibility (lesion length > 12 cm). For gene expression analyses, 4-cm leaf  
187 sections which were infiltrated with bacterial suspensions were collected at 48 h after  
188 inoculation for RNA extraction. Experiments included samples from three pooled  
189 biological replicate leaves. The plants inoculated with distilled water only were used as  
190 negative controls.

191

## 192 **Analysis of *OsSWEET14* edited allele sequences**

193 To determine the nature of the mutation at the target site, all transgenic T<sub>0</sub> or T<sub>1</sub> plants  
194 were analyzed by PCR using genomic DNA (50 ng) as a template and *OsSWEET14*  
195 specific primers (5'-TTGCGGCTCATCAGTTTCTC-3' and 5'-  
196 TGGATCAGATCAAAGGCAAC -3'). The PCR products were directly sequenced using  
197 the Sanger method. The sequencing chromatograms were decoded using the Degenerate  
198 Sequence Decoding method [31] in order to identify the mutations.

199

## 200 **Evaluation of major agronomic traits under net-house conditions**

201 WT and selected mutant plants were planted under net-house conditions in a randomized  
202 pot design experiment. At maturity, five plants of each line were investigated for the  
203 following agronomic traits: growth duration, plant height, number of tillers per plant,  
204 number of grains per panicle, number of filled grains per panicle and yield (seed mass)

205 per plant. The experiment was repeated three times, so a total of fifteen plants were  
206 evaluated for each line.

207

## 208 **Analysis of potential off-target editing**

209 Off-target sequences were predicted with the CCTop tool ([https://crispr.cos.uni-](https://crispr.cos.uni-heidelberg.de)  
210 [heidelberg.de](https://crispr.cos.uni-heidelberg.de)) **against the *OsSWEET14* promoter sgRNA** and the rice Nipponbare  
211 genome with default parameters. A total of 18 potential off-target sequences were  
212 identified. Three of them were located in coding regions (Table S2). These regions were  
213 amplified by PCR using the specific primers listed in Table S2 and analyzed by  
214 sequencing.

215

## 216 **Results**

### 217 **Vietnamese *Xoo* strains induce *OsSWEET14* during infection of the** 218 **TBR225 rice variety**

219 *OsSWEET14/OsIIN3* was previously identified as a susceptibility gene for *Xoo* strains  
220 relying on either of the AvrXa7, PthXo3, TalF (formerly Tal5) or TalC TALEs for  
221 infection of the rice cultivars Nipponbare and Kitaake [11]. Because *Xoo* strains tend to  
222 frequently target this gene, we first sequenced a region of the *OsSWEET14* promoter  
223 from rice cultivar TBR225 to examine if it also carries documented target EBEs. Based

224 on the Nipponbare genome sequence in database (AP014967.1), the region encompassing  
225 1343 bp sequence upstream and 52 bp sequence downstream of the predicted  
226 transcription start site of *OsSWEET14* gene from TBR225 rice cultivar was PCR  
227 amplified and sequenced (S1 Fig). The promoter region including the putative TATA box  
228 (TATAAA) and the AvrXa7, PthXo3, TalF/Tal5 and TalC EBEs (Fig 1A), located 319  
229 bp to 216 bp upstream of the ATG initiation codon, showed 100% identity to the  
230 Nipponbare sequence. This therefore implied that in principle, the TBR225 *OsSWEET14*  
231 promoter can be recognized by characterized major *Xoo* TALEs.

232 As illustrated by the representative experiment of Fig 2A, we also challenged TBR225  
233 plants with two Vietnamese *Xoo* strains VXO\_11 and VXO\_15, both originating from the  
234 Hanoi province, using leaf clipping assays. We consistently obtained typical extended  
235 disease lesions 14 days after inoculation (25.5 cm and 26.6 cm average lesions length for  
236 VXO\_11 and VXO\_15, respectively in the experiment of S2 Fig), indicating that the  
237 TBR225 variety is susceptible to BLB.

238 To test if *OsSWEET14* is a potential direct virulence target of Vietnamese *Xoo* strains, we  
239 infiltrated TBR225 rice leaves with the two Vietnamese *Xoo* strains. Forty-eight hours  
240 post infiltration, TBR225 plants inoculated with VXO strains displayed a strong  
241 induction of *OsSWEET14* relative to water controls (Fig 2B). These results suggest that  
242 *OsSWEET14* is a transcriptional target of VXO strains and that it may act as a  
243 susceptibility gene in TBR225.

244

245 **Fig 2. *OsSWEET14* is likely a susceptibility gene for Vietnamese *Xoo* strains in rice**  
246 **cultivar TBR225.** (A) Representative images of the disease lesions obtained 14 days  
247 after leaf clipping inoculation of TBR225 rice leaves with Vietnamese *Xoo* strains  
248 VXO\_11 and VXO\_15 or with water (CT). The chevrons above the leaves indicate the  
249 maximum visible extent of lesions away from the inoculation point on the left (B).  
250 *OsSWEET14* expression pattern obtained by RT-PCR two day post-infiltration of  
251 TBR225 rice leaves with Vietnamese *Xoo* strains. CT Plants were inoculated with water  
252 only. The experiment was repeated three times.

253

## 254 **CRISPR/Cas9 design for *OsSWEET14* promoter editing**

255 Our main objective was to engineer resistance to BLB caused by Vietnamese *Xoo* strains.  
256 To this end, we subsequently sought to specifically modify the *OsSWEET14* promoter in  
257 TBR225 rice with CRISPR/Cas9-mediated editing. Previous work revealed that while  
258 African *Xoo* strains rely on TalC and occasionally, TalF, all Asian *Xoo* strains use either  
259 PthXo3- or AvrXa7-like TALEs to activate *OsSWEET14* [11]. Because the *talC* gene is  
260 currently exclusively found in African strains, we reasoned that it is unlikely that  
261 Vietnamese strains carry a *talC* copy. Thus, to maximize our chances to perturb all  
262 remaining documented EBEs, we selected a 20-bp nucleotide target site overlapping the  
263 PthXo3, AvrXa7 and TalF EBEs and having a predicted cut site located near the 3'-end of  
264 the AvrXa7 EBE (Fig 1A). The recombinant binary plasmid pCas9/*OsSWEET14*-gRNA  
265 for CRISPR/Cas9 mediated editing of *OsSWEET14* was transformed into the rice variety

266 TBR225 via *Agrobacterium*-mediated transformation (S1 Table). A total of nine TBR225  
 267 transformants were selected from 10 independent PCR-validated transgenic T<sub>0</sub> TBR225  
 268 plants to further investigate CRISPR/Cas9-targeted mutagenesis of the *OsSWEET14*  
 269 promoter. In order to decipher the nature of the editing events in *OsSWEET14*, the  
 270 promoter sequencing data of transgenic lines were analyzed using the Degenerate  
 271 Sequence Decoding software [31]. All 9 T<sub>0</sub> transgenic plants harbored at least an **edition**  
 272 event (Fig 1C): two were heterozygous mutant/wild type, two had homozygous  
 273 mutations, and five had bi-allelic mutations. Regarding the type of mutations, 66.7%  
 274 were nucleotide deletions, 11.1% of the mutations were nucleotide insertions and no  
 275 substitution was detected (Table 1).

276

277 **Table 1. Frequencies of mutant genotypes and target mutation types in T<sub>0</sub>**  
 278 **transgenic plants.**

| Mutant genotype ratios <sup>a</sup> (%) |            |            | Mutation type ratios <sup>b</sup> (%) |             |              |
|-----------------------------------------|------------|------------|---------------------------------------|-------------|--------------|
| Heterozygote                            | Homozygote | Bi-allelic | Deletion                              | Insertion   | Substitution |
| 22.2 (2/9)                              | 22.2 (2/9) | 55.6 (5/9) | 66.7 (12/18)                          | 11.1 (2/18) | 0 (0/18)     |

<sup>a</sup> (Number of on-target mutant genotype/total number of on-target mutant genotypes) x 100%.

<sup>b</sup> (Number of allele mutation type/number of all allele mutation types) x 100%.

279

280 **Inheritance of CRISPR/Cas9-induced mutations in the T<sub>1</sub>**  
 281 **generation**

282 To assess the inheritance of the CRISPR/Cas9-induced *OsSWEET14* mutations in the  
 283 next generation, all T<sub>0</sub> mutant transgenic plants (Fig 1C) were allowed to self-pollinate,  
 284 and T<sub>1</sub> transgenic plants were randomly selected in the progeny of T<sub>0</sub> plants for  
 285 sequencing and analysis of their edited site (Table 2). All T<sub>1</sub> individuals derived from T<sub>0</sub>  
 286 plants previously genotyped as homozygous possessed the same allele as their parent,  
 287 suggesting stable inheritance of the mutations to the next generation. Similarly, the T<sub>1</sub>  
 288 progeny of each of both bi-allelic and heterozygous mutation T<sub>0</sub> lines showed a  
 289 segregation ratio which is consistent with Mendelian segregation ( $\chi^2 < \chi^2_{0.05, 2} = 5.99$ ),  
 290 indicating that the CRISPR/Cas9-induced mutations in T<sub>0</sub> plants were transmitted as  
 291 expected to the next generation. Interestingly, no new mutant allele was detected in the T<sub>1</sub>  
 292 generation of both heterozygous mutants L-21 and L-27, even though most of them still  
 293 carried the transgene. Overall, consistent with previous similar studies, our results  
 294 indicate that the CRISPR/Cas9-mediated mutations generated here are stably transmitted  
 295 to the next generation in a Mendelian fashion.

296 **Table 2. Transmission of CRISPR/Cas9 editing events to the T<sub>1</sub> generation.**

| T <sub>0</sub> plant | Genotype   | Allele(s) | No. of T <sub>1</sub> plants tested | Mutation inheritance in the T <sub>1</sub> generation |                  | No. of T-DNA-free plants |
|----------------------|------------|-----------|-------------------------------------|-------------------------------------------------------|------------------|--------------------------|
|                      |            |           |                                     | Alleles segregation                                   | $\chi^2$ (1:2:1) |                          |
| L-4                  | Bi-allelic | -5/-3     | 32                                  | 10 (-5), 18 (-5/-3), 4 (-3)                           | 2,750            | 5 (2*)                   |
| L-5                  | Bi-allelic | -6/+1     | 44                                  | 9 (-6), 22 (-6/+1), 13 (+1)                           | 0,727            | 10 (2*)                  |
| L-7                  | Bi-allelic | -4/-3     | 38                                  | 14 (-4), 17 (-4/-3), 7 (-3)                           | 3,000            | 11 (4*)                  |

|      |              |       |    |                             |       |        |
|------|--------------|-------|----|-----------------------------|-------|--------|
| L-15 | Homozygote   | +1    | 5  | 5 (+1)                      | -     | 1 (1*) |
| L-21 | Heterozygote | -3    | 26 | 3 (-3), 13 (-3/wt), 10 (wt) | 3,769 | 7 (1*) |
| L-27 | Bi-allelic   | -5/-4 | 7  | 1 (-5), 3(-5/-4), 3 (-4)    | 1,286 | 0      |
| L-29 | Heterozygote | -5    | 33 | 6 (-5), 19 (-5/wt), 8 (wt)  | 1,000 | 2 (0*) |
| L-31 | Homozygote   | -3    | 15 | 15 (-3)                     | -     | 5 (5*) |
| L-54 | Bi-allelic   | -3/-2 | 21 | 3 (-3), 12 (-3/-2), 6(-2)   | 1,286 | 3 (0*) |

“+” and “-” indicate respectively, insertion and deletion, of the indicated number of nucleotides.

“w”, wild type.

\*Number of homozygous mutant plants without T-DNA.

297

## 298 **Selection of transgene-free mutant TBR225 rice lines**

299 To identify T-DNA free T<sub>1</sub> rice plants containing a mutation in EBEs of the *OsSWEET14*  
300 promoter, PCR analysis was carried out using primers specific to *Cas9*, sgRNA and *HPT*  
301 sequences (Table 2). A T<sub>1</sub> individual was considered devoid of the transgene if the  
302 control amplification of the *OsSWEET14* promoter was successful and if none of the PCR  
303 reactions with independent primer pairs designed on the T-DNA produced a detectable  
304 diagnostic band. The results of this PCR screen show that the T-DNA could be  
305 segregated out in the progeny of most T<sub>0</sub> lines, with 88.9% of the T<sub>0</sub> lines generating T-  
306 DNA-free progeny. In total, 44 of 221 analyzed edited T<sub>1</sub> plants did not generate a  
307 specific amplicon from the T-DNA construct and 15 of them were homozygous mutant  
308 harboring the desired *OsSWEET14* modifications. Our results demonstrate that transgene-  
309 free, homozygous mutant individuals could be obtained in the segregating progeny of  
310 selfed T<sub>0</sub> individuals.



311

312 **TBR225 *OsSWEET14* promoter editing confers resistance to**  
313 **Vietnamese *Xoo***

314 To characterize the BLB-resistance phenotype of the generated rice mutants, three T-  
315 DNA-free, homozygous TBR225 edited lines, namely, L-5.7(-6), L-31.12(-3) and L-  
316 15.4(+1) with *OsSWEET14* promoter alleles corresponding respectively to L-5-a1 (6bp  
317 deletion), L-31 (3bp deletion) and L-15 (1bp insertion) in Fig 1C, were established.  
318 Selected T<sub>1</sub> individuals were propagated to obtain T<sub>2</sub> seeds which were used to perform  
319 BLB susceptibility assays. Edited T<sub>2</sub> and WT TBR225 plants were inoculated by leaf-  
320 clipping with the VXO\_11 and VXO\_15 strains at the eight-week stage. The inoculated  
321 leaves of wild type TBR225 plants and of edited lines L-15.4(+1) and L-31.12(-3)  
322 developed long water-soaked lesions typical of BLB, ranging from 18.3 cm to 29.0 cm in  
323 length. In contrast, the edited line L-5.7(-6), harboring a longer 6-bp deletion at the target  
324 site, displayed high (1.2 cm average lesion length) and moderate (7.3 cm average lesion  
325 length) resistance to VXO\_11 and VXO\_15 strains, respectively (Fig 3). Means  
326 comparisons with a Tukey's HSD test further indicated that irrespective of the inoculated  
327 strain, the mean lesion lengths measured on the L-15.4(+1), L-31.12(-3) or wild type  
328 lines were not significantly different. In contrast, the mean lesion lengths recorded on the  
329 L-5.7(-6) mutant line were significantly different from those obtained on the wild type  
330 and the two other edited lines challenged with either of the Vietnamese strains (Fig 3B).  
331 Furthermore, our off-target editing analysis on line L-5.7(-6) did not reveal unintended

332 modifications of other annotated rice loci (Table S2 and Figure S5), indicating that the 6-  
333 bp deletion in the *OsSWEET14* promoter is probably responsible for this phenotype.

334 Consistent with disease assays and as shown in Figure 3C, whereas a semiquantitative  
335 RT-PCR signal for *OsSWEET14* expression was detected on the parental variety and the  
336 L-15.4(+1) and L-31.12(-3) edited lines following VXO\_11 and VXO\_15 infiltration,  
337 this amplicon was undetectable in the resistant L-5.7(-6) line.

338 In conclusion, this data shows that the 6-bp deletion in the AvrXa7/PthXo3 EBE reduces  
339 dramatically *OsSWEET14* expression following VXO strains inoculation and confers  
340 resistance to these strains. In contrast, shorter modifications on the 3'-end of this EBE are  
341 insufficient to perturb *OsSWEET14* expression after inoculation and do not confer  
342 detectable protection against the corresponding strains. Finally, while these results  
343 strongly support the view that *OsSWEET14* functions as a unique susceptibility gene in  
344 the interaction between strain VXO\_11 and the TBR225 rice variety, the resistance to  
345 strain VXO\_15 is not as dramatic and may suggest that other mechanisms partially  
346 counteract the effects of the AvrXa7/PthXo3 EBE 6-bp deletion in edited TBR225 plants.

347

348 **Fig 3. BLB resistance assays for homozygous mutant rice lines L-5.7(-6), L-15.4(+1)**  
349 **and L-31.12(-3).** (A) Leaves were photographed 14 days post-leaf clipping inoculation of  
350 *Xoo* strains VXO\_11 and VXO\_15; arrow heads indicate the end of the lesion. (B) Mean  
351 lesion lengths (bars) and standard deviations (error bars). Values were measured 14 days  
352 post-leaf clipping inoculation of two *Xoo* strains VXO\_11 and VXO\_15 and were

353 computed from at least three leaves from each of three plants. Asterisks indicate  
354 significant differences relative to wild type plants (Tukey's HSD test;  $**P < 0.05$ ). The  
355 number in the parentheses following the line name indicates the type of mutation and the  
356 number of nucleotides involved. The letters above strain labels indicate susceptibility  
357 score (R - high resistance; M - moderate resistance; S - susceptibility). The experiment  
358 was repeated three times. (C) *OsSWEET14* expression pattern obtained by RT-PCR two  
359 day post-infiltration of genome edited homozygous mutant rice lines L-31.12(-3), L-  
360 15.4(+1) and L-5.7(-6) and parental TBR225 rice leaves with Vietnamese *Xoo* strains.  
361 This experiment was repeated two times with similar results.

362

363 **TBR225 *OsSWEET14* promoter edited lines agronomic**  
364 **performances are undistinguishable from the parental variety**

365 To determine if mutations in the *OsSWEET14* promoter affect agronomic traits of  
366 TRB225 rice plants, three independent homozygous mutant lines were analyzed by  
367 measuring their growth duration, plant height, number of tillers per plant, number of  
368 grains per panicle, number of filled grains per panicle, yield per plant and amylose  
369 content under net-house conditions (see picture of S3 Fig). ANOVA tests and Student's *t*  
370 tests showed that the mutant lines displayed no significant difference to TBR225, in  
371 terms of the examined agronomic traits, under our net-house conditions (Table 3). These

372 results suggest that the tested CRISPR/Cas9-induced mutations in the *OsSWEET14*  
 373 promoter did not negatively impact the main agronomic traits of TBR225.

374

375 **Table 3. Agronomic traits evaluation of homozygous T<sub>2</sub> mutant lines.**

| Lines       | Growth duration (day)    | Plant height (cm)       | No. of tillers per plant | No. of grains per panicle | No. of filled grains per panicle | Amylose content (%)      |
|-------------|--------------------------|-------------------------|--------------------------|---------------------------|----------------------------------|--------------------------|
| WT          | 108.4 ± 1.1 <sup>a</sup> | 86.6 ± 3.2 <sup>a</sup> | 5 ± 0.7 <sup>a</sup>     | 144.4 ± 4.9 <sup>a</sup>  | 125 ± 4.5 <sup>a</sup>           | 13.2 ± 0.38 <sup>a</sup> |
| L-5.7(-6)   | 108 ± 1.2 <sup>a</sup>   | 86.4 ± 4.3 <sup>a</sup> | 5.2 ± 0.4 <sup>a</sup>   | 144.2 ± 4.4 <sup>a</sup>  | 123.4 ± 5.5 <sup>a</sup>         | 13.7 ± 0.35 <sup>a</sup> |
| L-15.4(+1)  | 107.8 ± 0.8 <sup>a</sup> | 86.4 ± 5.0 <sup>a</sup> | 4.8 ± 0.4 <sup>a</sup>   | 147.8 ± 5.1 <sup>a</sup>  | 121.8 ± 3.0 <sup>a</sup>         | 13.5 ± 0.41 <sup>a</sup> |
| L-31.12(-3) | 108 ± 1.2 <sup>a</sup>   | 88.4 ± 4.3 <sup>a</sup> | 5.4 ± 0.5 <sup>a</sup>   | 144.6 ± 5.3 <sup>a</sup>  | 124.2 ± 7.4 <sup>a</sup>         | 13.8 ± 0.21 <sup>a</sup> |

Five plants per line were measured. Experiments were repeated three time.  
 Means followed by the same letter do not differ significantly ( $P < 0.05$ ).

376

377

## 378 Discussion

379 Recently, the CRISPR/Cas9 system has emerged as a powerful tool for gene editing in  
 380 many organisms including plants. Because of its specificity and efficiency, this system  
 381 has been widely used to improve important agronomic traits of major crops such as rape,  
 382 tomato, soybean, rice, wheat and maize [32]. Excluding easy-to-transform reference  
 383 accessions such as Nipponbare and Kitaake that are widely used in the laboratory, the  
 384 number of reports on the improvement of agriculturally relevant elite rice cultivars for  
 385 pertinent traits using the CRISPR/Cas9 technology (see for example [33–36]) is gradually  
 386 increasing but is still limited.

387 TBR225 [24], a major commercial rice variety cultivated in large areas of Northern  
388 Vietnam, has the advantages of early maturity, high and stable yield, as well as cooking  
389 quality. However, it is very susceptible to BLB. Here, the CRISPR/Cas9-mediated  
390 editing method was applied in order to rapidly improve the BLB resistance of TBR225 by  
391 modifying the AvrXa7, PthXo3 and TalF EBEs on the promoter of *OsSWEET14*. Of the  
392 three generated homozygous mutant lines tested for resistance, the one carrying the  
393 largest deletion at the target site (6 bp) showed a significantly improved resistance to  
394 infection with two *Xoo* strains VXO\_11 and VXO\_15. Therefore, using the major  
395 commercial rice variety TBR225 as an example, we illustrate the advantages of  
396 CRISPR/Cas9 tool for rice breeding.

397 In the present study, the frequency of individuals with CRISPR/Cas9-induced mutations  
398 in T<sub>0</sub> transgenic plants was 90%, which is similar to previous observation [28]. We  
399 obtained only two heterozygous mutant/wild type lines versus seven homozygous or bi-  
400 allelic mutant lines. This high frequency of mutated alleles is another proof that the  
401 CRISPR/Cas9 system is indeed an efficient tool for gene editing in plant. We also  
402 observed the stable transmission of edited alleles to subsequent generations. This is a  
403 common phenomenon that has been repeatedly documented for rice plants carrying  
404 CRISPR/Cas9-induced mutations [33,35]. In this study, we obtained only two types of  
405 induced mutations in T<sub>0</sub> plants: insertion (11.1%) and deletion (66.7%), but no  
406 substitution were observed. In some earlier studies, new mutations were continuously  
407 obtained in the T<sub>1</sub> offspring of heterozygous T<sub>0</sub> mutants because the Cas9 complex

408 remains active on edited targets until the seed or PAM regions cease to be functional  
409 [35,37,38]. In contrast, here, all the T<sub>1</sub> plants generated from both heterozygous lines L-  
410 21 and L-29, regardless of whether they had a CRISPR/Cas9 T-DNA transgene  
411 integrated in their genome, did not show any new mutation possibly because  
412 **CRISPR/Cas9 T-DNA transgene was no longer functional.** We could also readily obtain  
413 transgene-free plants from most of the T<sub>1</sub> segregation populations without any laborious  
414 crossing or backcrossing steps, which illustrates an advantage of the CRISPR/Cas9  
415 technology compared to conventional breeding.

416 Clade III SWEET family proteins are involved in a number of biological processes such  
417 as seed and pollen development or pathogen susceptibility [39]. Their inactivation has  
418 previously been shown to cause pleiotropic and/or detrimental effects. For example, both  
419 *ossweet11* single and *ossweet11-ossweet15* double Kitaake rice mutants showed defects  
420 in endosperm development and filling [40]. In addition, RNA-mediated silencing of  
421 either *Os11N3/OsSWEET14* [7] or *Os8N3/OsSWEET11* [6] in BLB resistant Kitaake  
422 lines causes negative effects on seed production. In contrast, here, we show that T-DNA-  
423 free TBR225 plants harboring homozygous mutations generated with the CRISPR/Cas9  
424 system in the *AvrXa7/PthXo3* EBE of the *OsSWEET14* promoter exhibited enhanced  
425 *Xoo* resistance but did not show any significant difference in all examined agronomic  
426 traits compared to wild-type plants under net-house growth conditions. It is conceivable  
427 that limited modifications in promoter regions do not affect the normal expression of  
428 *SWEET* genes in contrast to KO or silenced lines. Our findings are consistent with the

429 previous work of Oliva et al. [11] who studied 30 combinations of EBE mutations in the  
430 *OsSWEET11*, *OsSWEET13* and *OsSWEET14* promoters of the IR64 or Ciherang-Sub1  
431 varieties and detected only a single line with abnormal agronomic traits.

432 Some individual *Xoo* strains have evolved a set of distinct TALE effectors that  
433 collectively target several members of the clade III SWEET family. The presence of these  
434 redundant TALEs thereby trumps single “loss-of-tale-responsiveness” resistance alleles  
435 [11,12,17,41]. For example, Kitaake lines carrying TALEN-induced mutation in the  
436 *SWEET14* promoter [13,15] exhibit resistance to strains which depend exclusively on  
437 matching AvrXa7/PthXo3 for clade III *SWEET* family induction. Likewise, the natural  
438 *xa13* allele [42] or CRISPR/Cas9-induced mutation in the *SWEET11* promoter [11]  
439 exhibit resistance to strains such as PXO99 which depend exclusively on PthXo1, for  
440 virulence. However, the BLB resistance of the Kitaake lines harboring mutations in both  
441 AvrXa7/PthXo3 (*OsSWEET14*) and PthXo1 (*OsSWEET11*) EBEs was defeated by *Xoo*  
442 strains expressing simultaneously the AvrXa7/PthXo3 and PthXo2B TALEs [11].  
443 Recently, the stacking of EBE-edited alleles in several *OsSWEET* promoters have  
444 overcome this limitation and was shown to achieve a broad spectrum of resistance to  
445 strains from most BLB-prone countries in Asia [11,12].

446 All of the three T<sub>2</sub> lines tested for BLB resistance were affected for the AvrXa7/PthXo3  
447 EBE and conserved an otherwise wild type TalF EBE (Fig 1C). The homozygous mutant  
448 TBR225 line L-5.7(-6) carrying a 6-bp deletion in the AvrXa7/PthXo3 EBE exhibited a  
449 significantly enhanced resistance to two Vietnamese *Xoo* strains compared to WT

450 TBR225. The L-15.4(+1) and L-31.12(-3) lines that harbored more subtle alterations in  
451 the 3'-end of this EBE (a 1-bp insertion and a 3-bp deletion, respectively) in contrast  
452 remained susceptible to VXO strains. Our *OsSWEET14* expression analysis after  
453 Vietnamese Xoo strains inoculation (Fig 1C) suggests that these editing events did not  
454 alter the EBE sequence sufficiently to compromise promoter recognition by an  
455 AvrXa7/PthXo3-like Vietnamese TALE. With less than 2 cm average lesion length, the  
456 resistance of line L-5.7(-6) (6-bp deletion) to the VXO\_11 strain is rather extreme (versus  
457 average lesion length of 20.1 cm on wild type plants). Moreover, in this line,  
458 *OsSWEET14* expression following bacterial inoculation is strongly reduced relative the  
459 parental line and the two other edited lines, which suggest that in this case, recognition by  
460 an AvrXa7/PthXo3-like Vietnamese TALE is abrogated. Consistent with *OsSWEET14*  
461 expression analysis and as shown in S4 Fig, the Talvez [43] target prediction scores for  
462 AvrXa7 and PthXo3 on the *OsSWEET14* promoter L-5-a1 allele sequence of line L-5.7(-  
463 6) are markedly lower than on the wild type promoter sequence. This is not the case  
464 however for the edited alleles carried by lines L-15.4(+1) and L-31.12(-3) (respectively  
465 L-15 and L-31 in S4 Fig) whose Talvez scores are identical or slightly lower than those  
466 of the wild type promoter sequence.

467 The magnitude of the effect of the 6-bp deletion allele on susceptibility to VXO\_11 is  
468 comparable to the dramatic effect of previously characterized alterations of the same  
469 EBEs in the Kitaake background against the PXO86 strain that possesses a single TALE,  
470 AvrXa7, targeting *OsSWEET14* for clade III *OsSWEET* gene induction [15]. By analogy,



471 this suggests that *OsSWEET14* is also the only clade III *OsSWEETs* target of VXO\_11 in  
472 the TBR225 background but, in order to confirm this hypothesis an examination of other  
473 clade III *OsSWEET* genes expression patterns in response to this strain would be  
474 required. The situation with the VXO\_15 strain is not as straightforward to interpret and  
475 will require further investigations. Although the 6-bp deletion in the AvrXa7/PthXo3  
476 EBE did provide an increased resistance to the edited plants, the VXO\_15 strain caused  
477 intermediate disease severity (7.3 cm average lesion length on Fig 3). This incomplete  
478 resistance is unlikely to result from the partial but still productive recognition of  
479 subsequences of the altered EBE by a VXO\_15 AvrXa7/PthXo3-like TALE because  
480 *OsSWEET14* expression is similarly decreased in response to either this strain or  
481 VXO\_11 (Fig 3C). Alternatively, contrary to all Asian *Xoo* examined so far, but similar  
482 to African *Xoo* [15], VXO\_15 may have the intrinsic potential to cause disease in the  
483 absence of clade III *OsSWEET* gene induction. More likely, analogous to other Asian  
484 strains, VXO\_15 may encode alternative TALEs, such as PthXo2B or PthXo1 that  
485 compensate the loss of *OsSWEET14* induction by targeting other clade III *OsSWEET*  
486 genes. In this regard, long read genome sequencing will ultimately help describe TALEs  
487 variability in Vietnamese *Xoo* strains.

488 In conclusion, we showed that editing specific EBEs of *Xoo* TALEs via CRISPR/Cas9  
489 tool is an efficient method for improving BLB resistance of elite rice varieties such as  
490 TBR225 without detectable yield penalties. This also uncovered the potential diversity of  
491 TALEs in Vietnamese *Xoo* population, which will thus require future investigations to

492 address the TALE repertoires of Vietnamese *Xoo* strains in order to generate broad-  
493 spectrum BLB-resistant rice varieties in Vietnam.

494

## 495 **Authors' Contributions**

496 Nguyen Duy Phuong and Tran Lan Dai are equal contributors

497 **Conceptualization:** Pham Xuan Hoi, Sebastien Cunnac, Nguyen Duy Phuong

498 **Data Curation:** Nguyen Duy Phuong

499 **Formal Analysis:** Nguyen Duy Phuong, Tran Lan Dai, Sebastien Cunnac, Pham Xuan

500 Hoi

501 **Funding Acquisition:** Nguyen Duy Phuong, Pham Xuan Hoi, Tran Manh Bao

502 **Investigation:** Nguyen Duy Phuong, Tran Lan Dai, Pham Thu Hang, Phung Thi Thu

503 Huong, Nguyen Thanh Ha, Pham Phuong Ngoc, Florence Auguy, Sebastien Cunnac

504 **Methodology:** Nguyen Duy Phuong, Tran Lan Dai, Pham Thu Hang, Sebastien Cunnac,

505 Nguyen Thanh Ha, Pham Xuan Hoi

506 **Project Administration:** Pham Xuan Hoi

507 **Resources:** Pham Thu Hang, Florence Auguy, Nguyen Thanh Ha

508 **Supervision:** Sebastien Cunnac, Pham Xuan Hoi

509 **Validation:** Sebastien Cunnac, Pham Xuan Hoi

510 **Writing – Original Draft Preparation:** Nguyen Duy Phuong, Tran Lan Dai

511 **Writing – review & editing:** Sebastien Cunnac, Pham Xuan Hoi, Tran Manh Bao, Bui

512 Thi Thu Huong

513

## 514 **Acknowledgments**

515 We are grateful to Msc. Pham Thi Van, Dr. Cao Le Quyen and Dr. Nguyen Van Cuu

516 from the Institute of Agricultural Genetics for rice transformation experiments, Msc.

517 Nguyen Thi Thu Ha from the Institute of Agricultural Genetics for managing the *Xoo*

518 strains collection and Msc. Nguyen Thi Nhung from Thaibinh Seeds Cor. for kindly

519 providing the rice accessions.

520

521

## 522 **References**

- 523 1. Zhang H, Wang S. Rice versus *Xanthomonas oryzae* pv. *oryzae*: A unique  
524 pathosystem. *Curr Opin Plant Biol.* 2013; 16(2):188-195.  
525 doi:10.1016/j.pbi.2013.02.008 PMID: 23466254
- 526 2. White FF, Potnis N, Jones JB, Koebnik R. The type III effectors of *Xanthomonas*.  
527 *Mol Plant Pathol.* 2009; 10(6):749-766. doi:10.1111/j.1364-3703.2009.00590.x  
528 PMID: 19849782
- 529 3. Boch J, Bonas U, Lahaye T. TAL effectors - pathogen strategies and plant  
530 resistance engineering. *New Phytol.* 2014; 204(4):823-832. doi:10.1111/nph.13015  
531 PMID: 25539004
- 532 4. Bogdanove AJ, Schornack S, Lahaye T. TAL effectors: Finding plant genes for  
533 disease and defense. *Curr Opin Plant Biol.* 2010; 13(4):394-401.  
534 doi:10.1016/j.pbi.2010.04.010 PMID: 20570209
- 535 5. Bezruczyk M, Yang J, Eom JS, Prior M, Sosso D, Hartwig T, Szurek B, Oliva R,  
536 Vera-Cruz C, White FF, Yang B, Frommer WB. Sugar flux and signaling in plant–  
537 microbe interactions. *Plant J.* 2018; 93(4):675-685. doi:10.1111/tpj.13775 PMID:  
538 29160592
- 539 6. Yang B, Sugio A, White FF. *Os8N3* is a host disease-susceptibility gene for

- 540 bacterial blight of rice. Proc Natl Acad Sci U S A. 2006; 103(27):10503-10508.  
541 doi:10.1073/pnas.0604088103 PMID: 16798873
- 542 7. Antony G, Zhou J, Huang S, Li T, Liu B, White F, Yang B. Rice *xa13* recessive  
543 resistance to bacterial blight is defeated by induction of the disease susceptibility  
544 gene *Os-IIN3*. Plant Cell. 2010; 22(11):3864-3876. doi:10.1105/tpc.110.078964  
545 PMID: 21098734
- 546 8. Yu Y, Streubel J, Balzergue S, Champion A, Boch J, Koebnik R, Feng J, Verdier  
547 V, Szurek B. Colonization of rice leaf blades by an African strain of *Xanthomonas*  
548 *oryzae* pv. *oryzae* depends on a new TAL effector that induces the rice nodulin-3  
549 *OsIIN3* gene. Mol Plant-Microbe Interact. 2011; 24(9):1102-1113.  
550 doi:10.1094/MPMI-11-10-0254 PMID: 21679014.
- 551 9. Streubel J, Pesce C, Hutin M, Koebnik R, Boch J, Szurek B. Five phylogenetically  
552 close rice *SWEET* genes confer TAL effector-mediated susceptibility to  
553 *Xanthomonas oryzae* pv. *oryzae*. New Phytol. 2013; 200(3):808-819.  
554 doi:10.1111/nph.12411 PMID: 23879865
- 555 10. Zhou J, Peng Z, Long J, Sosso D, Liu B, Eom JS, Huang S, Liu S, Vera Cruz C,  
556 Frommer WB, White FF, Yang B. Gene targeting by the TAL effector PthXo2  
557 reveals cryptic resistance gene for bacterial blight of rice. Plant J. 2015; 82(4):632-  
558 643. doi:10.1111/tpj.12838 PMID: 25824104
- 559 11. Oliva R, Ji C, Atienza-Grande G, Huguet-Tapia JC, Perez-Quintero A, Li T, Eom

- 560 JS, Li C, Nguyen H, Liu B, Auguy F, Sciallano C, Luu VT, Dossa GS, Cunnac S,  
561 Schmidt SM, Slamet-Loedin IH, Vera Cruz C, Szurek B, Frommer WB, White FF,  
562 Yang B. Broad-spectrum resistance to bacterial blight in rice using genome editing.  
563 Nat Biotechnol. 2019; 37(11):1344-1350. doi:10.1038/s41587-019-0267-z PMID:  
564 31659337
- 565 12. Xu Z, Xu X, Gong Q, Li Z, Li Y, Wang S, Yang Y, Ma W, Liu L, Zhu B, Zou L,  
566 Chen G. Engineering broad-spectrum bacterial blight resistance by simultaneously  
567 disrupting variable TALE-binding elements of multiple susceptibility genes in rice.  
568 Mol Plant. 2019; 12(11):1434-1446. doi:10.1016/j.molp.2019.08.006 PMID:  
569 31493565
- 570 13. Li T, Liu B, Spalding MH, Weeks DP, Yang B. High-efficiency TALEN-based  
571 gene editing produces disease-resistant rice. Nat Biotechnol. 2012; 30(5):390-392.  
572 doi:10.1038/nbt.2199 PMID: 22565958
- 573 14. Hutin M, Pérez-Quintero AL, Lopez C, Szurek B. MorTAL Kombat: The story of  
574 defense against TAL effectors through loss-of-susceptibility. Front Plant Sci. 2015;  
575 6:535. doi:10.3389/fpls.2015.00535 PMID: 26236326
- 576 15. Blanvillain-Baufumé S, Reschke M, Solé M, Auguy F, Doucoure H, Szurek B,  
577 Meynard D, Portefaix M, Cunnac S, Guiderdoni E, Boch J, Koebnik R. Targeted  
578 promoter editing for rice resistance to *Xanthomonas oryzae* pv. *oryzae* reveals  
579 differential activities for *SWEET14*-inducing TAL effectors. Plant Biotechnol J.  
580 2017; 15(3):306-317. doi:10.1111/pbi.12613 PMID: 27539813

- 581 16. Zaka A, Grande G, Coronejo T, Quibod IL, Chen CW, Chang SJ, Szurek B, Arif  
582 M, Cruz CV, Oliva R. Natural variations in the promoter of *OsSWEET13* and  
583 *OsSWEET14* expand the range of resistance against *Xanthomonas oryzae* pv.  
584 *oryzae*. PLoS One. 2018; 13(9):e0203711. doi:10.1371/journal.pone.0203711  
585 PMID: 30212546
- 586 17. Huang S, Antony G, Li T, Liu B, Obasa K, Yang B, White FF. The broadly  
587 effective recessive resistance gene *xa5* of rice is a virulence effector-dependent  
588 quantitative trait for bacterial blight. Plant J. 2016; 86(2):186-194.  
589 doi:10.1111/tpj.13164 PMID: 26991395
- 590 18. Li J, Li Y, Ma L. CRISPR/Cas9-based genome editing and its applications for  
591 functional genomic analyses in plants. Small Methods. 2019; 3(3):1800473.  
592 doi:10.1002/smt.201800473 PMID: 27895652
- 593 19. Van Hop D, Phuong Hoa PT, Quang ND, Ton PH, Ha TH, Van Hung N, et al.  
594 Biological control of *Xanthomonas oryzae* pv. *oryzae* causing rice bacterial blight  
595 disease by *Streptomyces toxytricini* VN08-A-12, isolated from soil and leaf-litter  
596 samples in Vietnam. Biocontrol Sci. 2014; 19(3):103-111. doi:10.4265/bio.19.103  
597 PMID: 25252641
- 598 20. Furuya N, Taura S, Goto T, Trong Thuy B, Huu Ton P, Tsuchiya K, Yoshimura A.  
599 Diversity in virulence of *Xanthomonas oryzae* pv. *oryzae* from Northern Vietnam.  
600 Japan Agric Res Q. 2012; 46(4):329-338. doi:10.6090/jarq.46.329

- 601 21. Nguyen HT, Vu QH, Van Mai T, Nguyen TT, Vu LD, Nguyen TT, Nguyen LV,  
602 Vu HTT, Nong HT, Dinh TN, Toshitsugu N, Vu LV. Marker-Assisted Selection of  
603 *Xa21* conferring resistance to bacterial leaf blight in indica rice cultivar LT2. Rice  
604 Sci. 2018; 25(1):52-56. doi:10.1016/j.rsci.2017.08.004
- 605 22. Jiang N, Yan J, Liang Y, Shi Y, He Z, Wu Y, Zeng Q, Liu X, Peng J. Resistance  
606 genes and their interactions with bacterial blight/leaf streak pathogens  
607 (*Xanthomonas oryzae*) in rice (*Oryza sativa* L.) - an updated review. Rice. 2020;  
608 13(1):3. doi:10.1186/s12284-019-0358-y PMID: 31915945
- 609 23. Eom JS, Luo D, Atienza-Grande G, Yang J, Ji C, Thi Luu V, Huguet-Tapia JC,  
610 Char SN, Liu B, Nguyen H, Schmidt SM, Szurek B, Vera Cruz C, White FF, Oliva  
611 R, Yang B, Frommer WB. Diagnostic kit for rice blight resistance. Nat Biotechnol.  
612 2019; 37(11):1372-1379. doi:10.1038/s41587-019-0268-y PMID: 31659338
- 613 24. Manh Bao T, Thi Hop T, Thi Tiec T, Thi Nhung N, Van Hoan N. Results of  
614 breeding TBR225 rice cultivar. Vietnam J. Agri. Sci. 2016; 14(9):1360-1367. In  
615 Vietnamese. Available from: [http://www1.vnua.edu.vn/tapchi/Upload/15112016-](http://www1.vnua.edu.vn/tapchi/Upload/15112016-so%208.7.pdf)  
616 [so%208.7.pdf](http://www1.vnua.edu.vn/tapchi/Upload/15112016-so%208.7.pdf)
- 617 25. Zhou J. Host target genes of the *Xanthomonas oryzae* pv . *oryzae* type III effectors  
618 for bacterial blight in rice. Graduate Theses and Dissertations, The Iowa State  
619 University. 2015. Available from:  
620 <https://lib.dr.iastate.edu/cgi/viewcontent.cgi?article=5476&context=etd>



- 621 26. Li T, Huang S, Zhou J, Yang B. Designer TAL effectors induce disease  
622 susceptibility and resistance to *Xanthomonas oryzae* pv. *oryzae* in rice. *Mol Plant*.  
623 2013; 6(3):781-789. doi:10.1093/mp/sst034 PMID: 23430045
- 624 27. Herbert L, Meunier AC, Bes M, Vernet A, Portefaix M, Durandet F, Michel R,  
625 Chaine C, This P, Guiderdoni E, Périn C. Beyond seek and destroy: how to  
626 generate allelic series using genome editing tools. *Rice*. 2020; 13(1):5.  
627 doi:10.1186/s12284-020-0366-y PMID: 31993780
- 628 28. Zhou H, Liu B, Weeks DP, Spalding MH, Yang B. Large chromosomal deletions  
629 and heritable small genetic changes induced by CRISPR/Cas9 in rice. *Nucleic*  
630 *Acids Res*. 2014; 42(17):10903-10914. doi:10.1093/nar/gku806 PMID: 25200087
- 631 29. Hiei Y, Ohta S, Komari T, Kumashiro T. Efficient transformation of rice (*Oryza*  
632 *sativa* L.) mediated by *Agrobacterium* and sequence analysis of the boundaries of  
633 the T- DNA. *Plant J*. 1994; 6(2):271-282. doi:10.1046/j.1365-  
634 313X.1994.6020271.x PMID: 7920717
- 635 30. Bai J, Choi SH, Ponciano G, Leung H, Leach JE. *Xanthomonas oryzae* pv. *oryzae*  
636 avirulence genes contribute differently and specifically to pathogen aggressiveness.  
637 *Mol Plant Microbe Interact*. 2000; 13(12):1322-1329.  
638 doi:10.1094/MPMI.2000.13.12.1322 PMID: 11106024
- 639 31. Ma X, Chen L, Zhu Q, Chen Y, Liu YG. Rapid decoding of sequence-specific  
640 nuclease-induced heterozygous and biallelic mutations by direct sequencing of

- 641 PCR products. Mol Plant. 2015; 8(8):1285-1287. doi:10.1016/j.molp.2015.02.012  
642 PMID: 25747846
- 643 32. Razzaq A, Saleem F, Kanwal M, Mustafa G, Yousaf S, Imran Arshad HM,  
644 Hameed MK, Khan MS, Joyia FA. Modern trends in plant genome editing: An  
645 inclusive review of the CRISPR/Cas9 Toolbox. Int J Mol Sci. 2019; 20(16):4045.  
646 doi:10.3390/ijms20164045 PMID: 31430902
- 647 33. Wang F, Wang C, Liu P, Lei C, Hao W, Gao Y, Liu YG, Zhao K. Enhanced rice  
648 blast resistance by CRISPR/Cas9-Targeted mutagenesis of the ERF transcription  
649 factor gene *OsERF922*. PLoS One. 2016;11(4):e0154027.  
650 doi:10.1371/journal.pone.0154027 PMID: 27116122
- 651 34. Zhou H, He M, Li J, Chen L, Huang Z, Zheng S, Zhu L, Ni E, Jiang D, Zhao B,  
652 Zhuang C. Development of commercial thermo-sensitive genic male sterile rice  
653 accelerates hybrid rice breeding using the CRISPR/Cas9-mediated TMS5 editing  
654 system. Sci Rep. 2016; 6:37395. doi:10.1038/srep37395 PMID: 27874087
- 655 35. Zhang A, Liu Y, Wang F, Li T, Chen Z, Kong D, Bi J, Zhang F, Luo X, Wang J,  
656 Tang J, Yu X, Liu G, Luo L. Enhanced rice salinity tolerance via CRISPR/Cas9-  
657 targeted mutagenesis of the *OsRR22* gene. Mol Breed. 2019; 39:47.  
658 doi:10.1007/s11032-019-0954-y PMID: 32803201
- 659 36. Zafar K, Khan MZ, Amin I, Mukhtar Z, Yasmin S, Arif M, Ejaz K, Mansoor S.  
660 Precise CRISPR-Cas9 mediated genome editing in super Basmati rice for

- 661 resistance against bacterial blight by targeting the major susceptibility gene. *Front*  
662 *Plant Sci.* 2020; 11:575. doi:10.3389/fpls.2020.00575 PMID: 32595655
- 663 37. Kim YA, Moon H, Park CJ. CRISPR/Cas9-targeted mutagenesis of *Os8N3* in rice  
664 to confer resistance to *Xanthomonas oryzae* pv. *oryzae*. *Rice.* 2019; 12(1):67.  
665 doi:10.1186/s12284-019-0325-7 PMID: 31446506
- 666 38. Molla KA, Shih J, Yang Y. Single-nucleotide editing for zebra3 and wsl5  
667 phenotypes in rice using CRISPR/Cas9-mediated adenine base editors.  
668 *aBIOTECH.* 2020;1(2):106-118. doi:10.1007/s42994-020-00018-x
- 669 39. Chen LQ. SWEET sugar transporters for phloem transport and pathogen nutrition.  
670 *New Phytol.* 2014; 201(4):1150-1155. doi:10.1111/nph.12445 PMID: 24649486
- 671 40. Yang J, Luo D, Yang B, Frommer WB, Eom JS. SWEET11 and 15 as key players  
672 in seed filling in rice. *New Phytol.* 2018; 218(2):604-615. doi:10.1111/nph.15004  
673 PMID: 293935104
- 674 41. Doucouré H, Pérez-Quintero AL, Reshetnyak G, Tekete C, Auguy F, Thomas E,  
675 Koebnik R, Szurek B, Koita O, Verdier V, Cunnac S. Functional and genome  
676 sequence-driven characterization of *tal* effector gene repertoires reveals novel  
677 variants with altered specificities in closely related malian *Xanthomonas oryzae* pv.  
678 *oryzae* strains. *Front Microbiol.* 2018; 9:1657. doi:10.3389/fmicb.2018.01657  
679 PMID: 30127769
- 680 42. Chu Z, Yuan M, Yao J, Ge X, Yuan B, Xu C, Li X, Fu B, Li Z, Bennetzen JL,

681 Zhang Q, Wang S. Promoter mutations of an essential gene for pollen development  
682 result in disease resistance in rice. *Genes Dev.* 2006; 20(10):1250-1255.  
683 doi:10.1101/gad.1416306 PMID: 16648463

684 43. Pérez-Quintero AL, Rodriguez-R LM, Dereeper A, López C, Koebnik R, Szurek B,  
685 Cunnac S. An Improved Method for TAL Effectors DNA-Binding Sites Prediction  
686 Reveals Functional Convergence in TAL Repertoires of *Xanthomonas oryzae*  
687 Strains. *PLoS One.* 2013; 8(7):68464. doi:10.1371/journal.pone.0068464 PMID:  
688 23869221

689

690

## 691 **Supporting information**

692 **S1\_raw\_images. Original photograph used in Fig 2 for the RT-PCR gels panel.**

693 **S2\_raw\_images. Original photograph used in Fig 3C for the RT-PCR gels panel.**

694 **S1 Fig. Nucleotide sequence of the *OsSEET14* promoter in TBR225.**

695 **S2 Fig. Virulence of Vietnamese *Xoo* strains VXO\_11 and VXO\_15 on TBR225 rice.**

696 Grey points correspond to individual lesion length measurements while the black points  
697 indicate the calculated average value. The line range represents standard deviation.

698 **S3 Fig. Picture of an individual plant from the homozygous mutant rice lines L-5.7(-  
699 6).**

700 **S4 Fig. Talvez scoring of AvrXa7, PthXo3 and TalF target EBES in the edited  
701 *OsSWEET14* promoter allele sequences.** Score values are represented both by the  
702 length of the horizontal bar and a fill color scale. Higher Talvez prediction scores reflect  
703 a better match between a predicted EBE and the sequence of RVD of the query TALE.

704 **S5 Fig. Amplicon sequencing of predicted off-target sites for the *OsSWEET14*  
705 promoter-sgRNA in annotated exons of the TBR225 edited line L-5.7(-6).** Potential  
706 unintended target sequences including the PAM are highlighted in boxes. They are all  
707 identical to the expected wild type Nipponbare sequences.

708 **S1 Table. Key figures on the TBR225 transformation procedure for *OsSWEET14*  
709 promoter editing.**

710 **S2 Table. Output of the CCTop tool used with the *OsSWEET14* promoter sgRNA**  
711 **for off-target prediction on the rice Nipponbare genome.**  
712

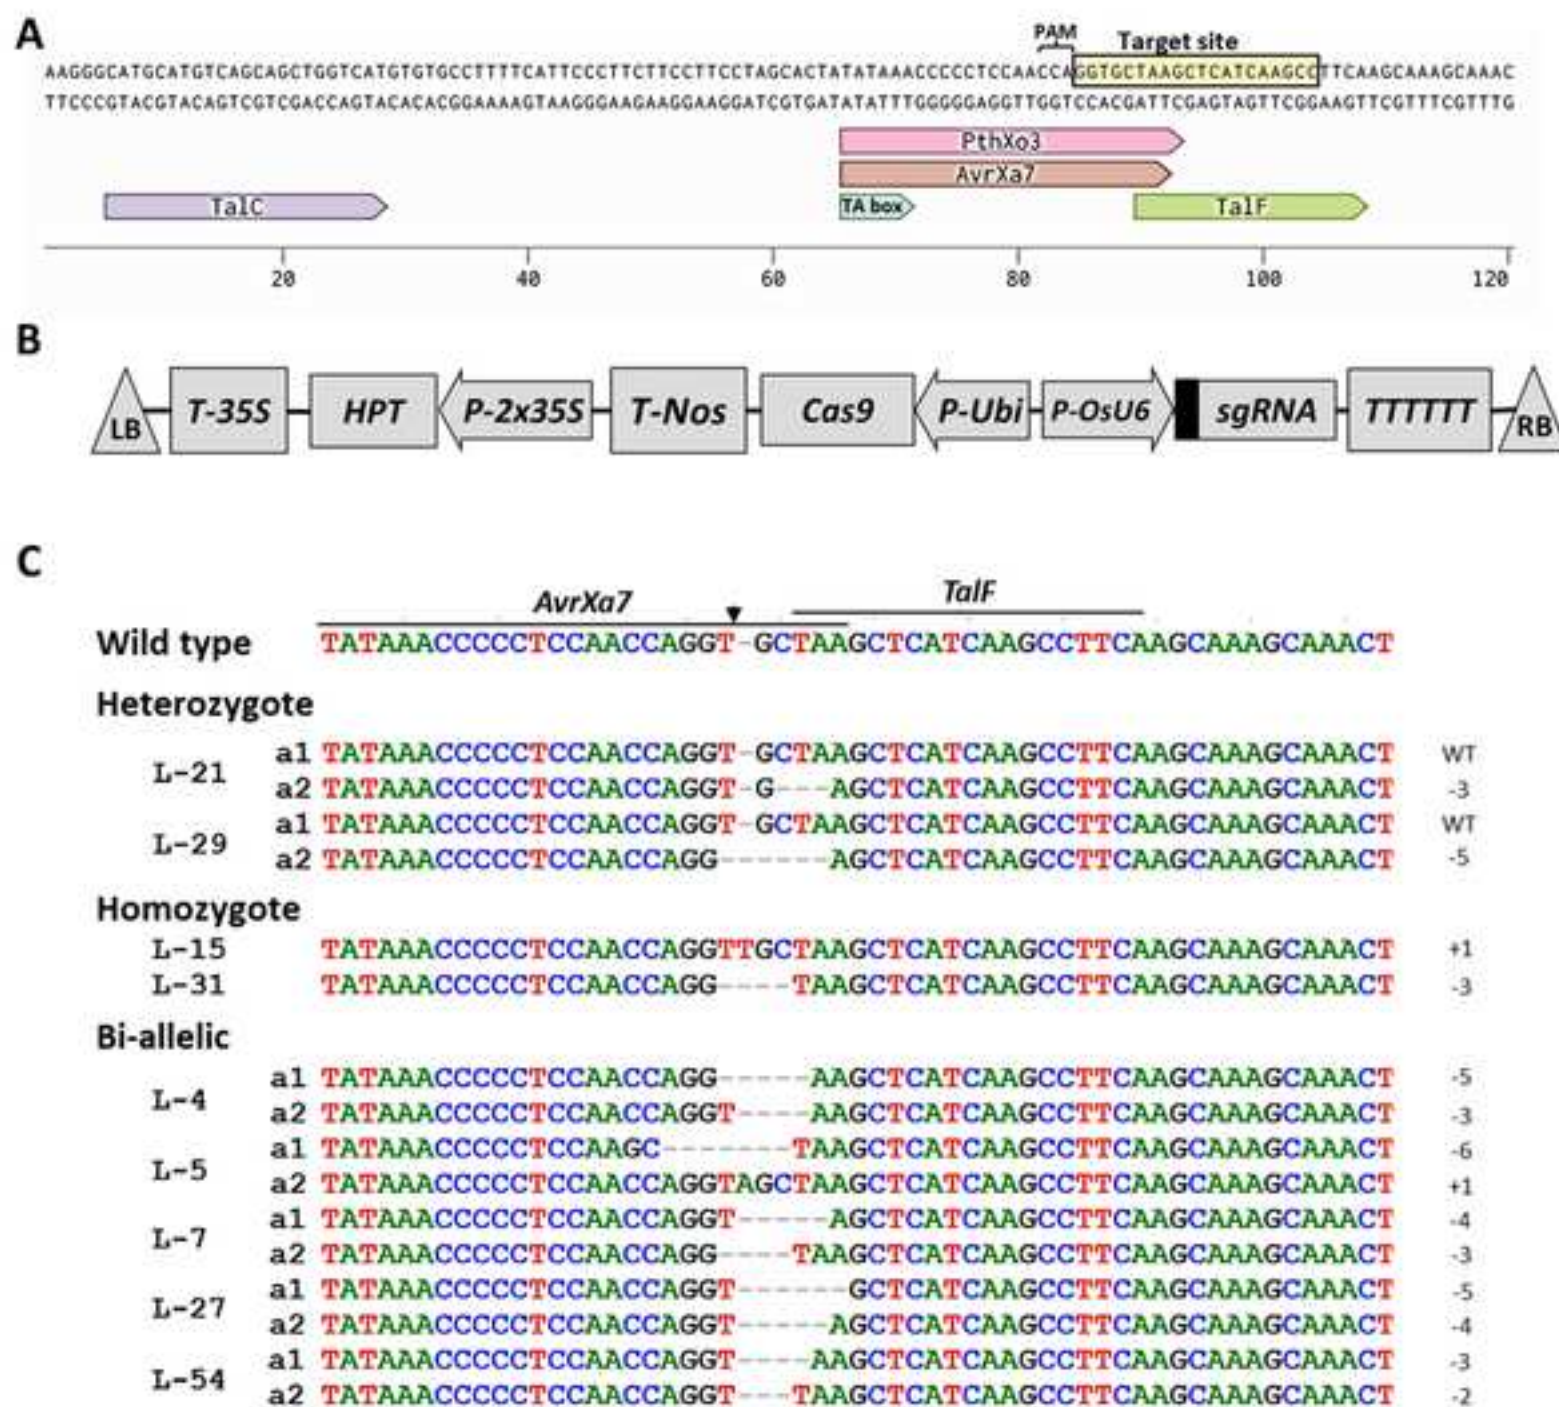

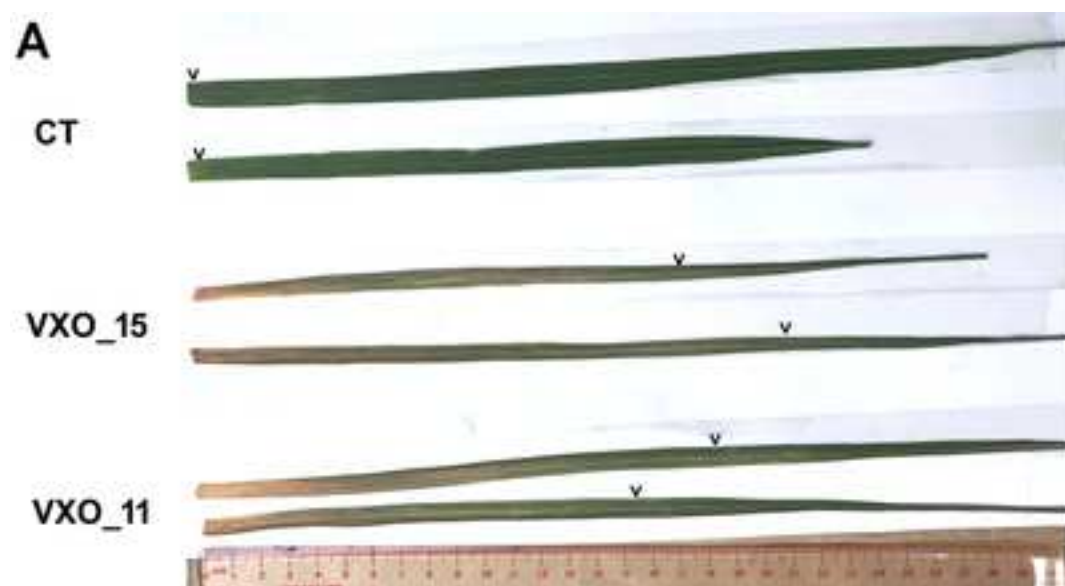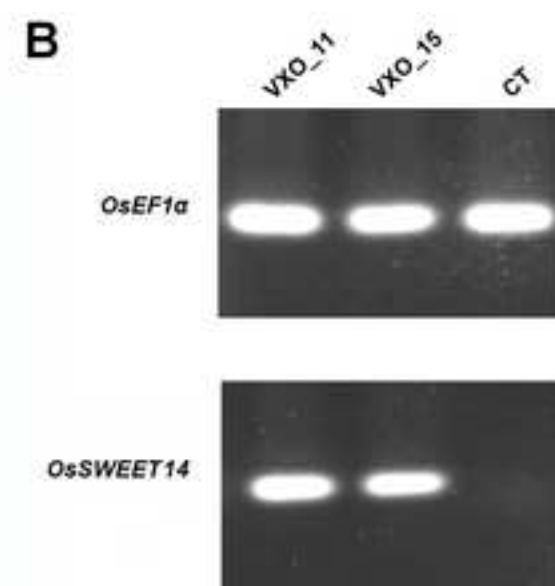



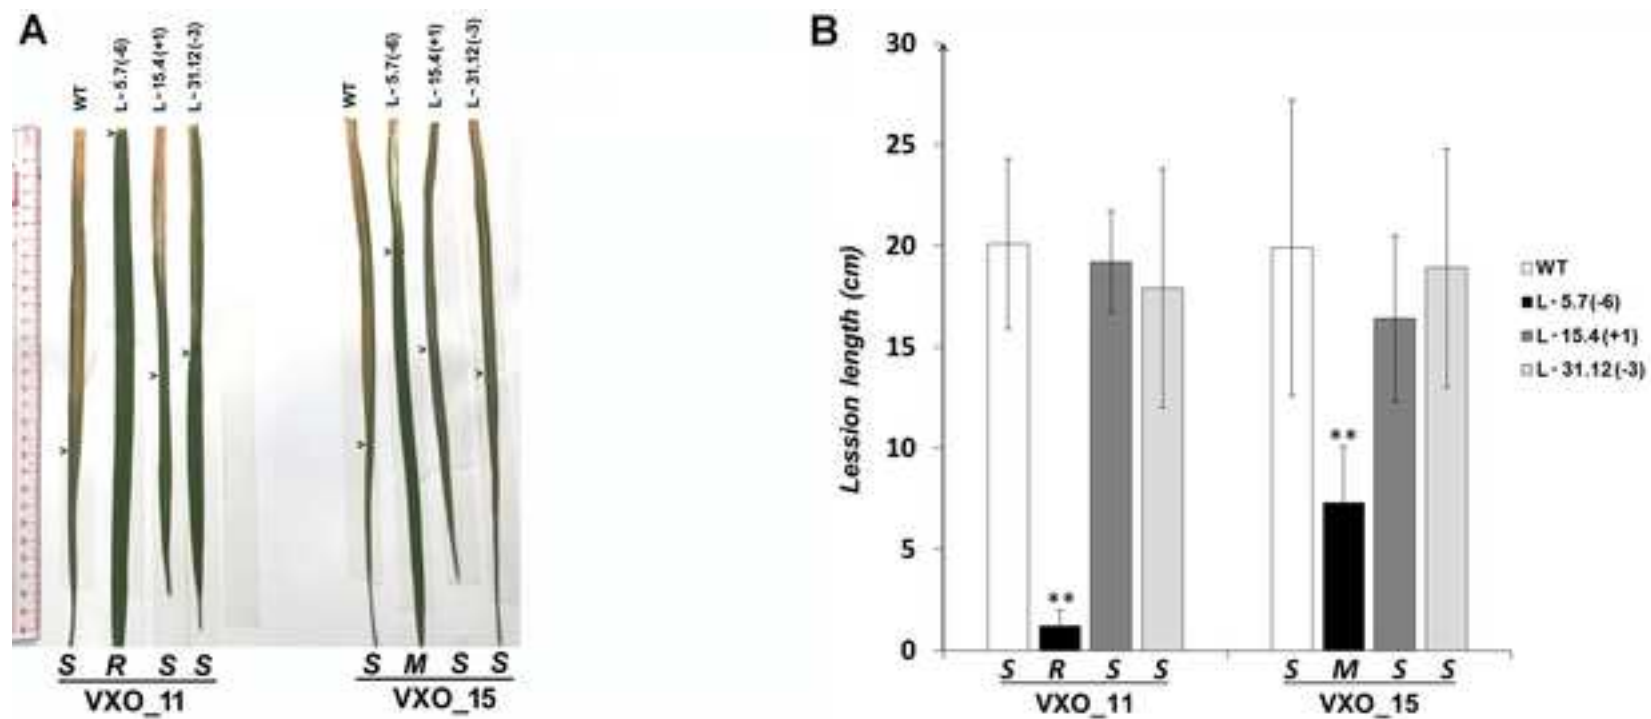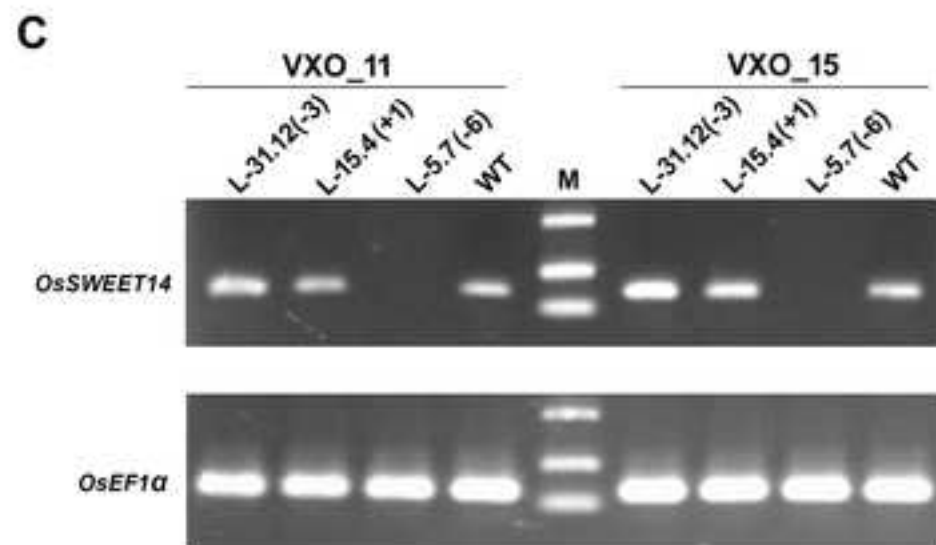

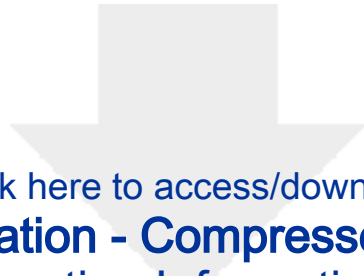

[Click here to access/download](#)

**Supporting Information - Compressed/ZIP File Archive**  
**Supporting Information.rar**

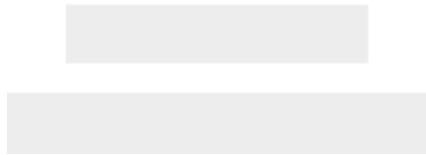

1 **Full title:**

2 **Improved bacterial leaf blight disease resistance in the major elite Vietnamese**  
3 **rice cultivar TBR225 via editing of the *OsSWEET14* promoter**

4 **Short title:**

5 **Improved bacterial leaf blight disease resistance in Vietnamese rice cultivar**  
6 **TBR225**

7 **Nguyen Duy Phuong<sup>1¶</sup>, Tran Lan Dai<sup>1,2¶</sup>, Pham Thu Hang<sup>1</sup>, Phung Thi Thu Huong<sup>1</sup>,**  
8 **Nguyen Thanh Ha<sup>1</sup>, Pham Phuong Ngoc<sup>1,¶a</sup>, Florence Auguy<sup>3</sup>, Bui Thi Thu Huong<sup>4</sup>, Tran**  
9 **Manh Bao<sup>5</sup>, Sebastien Cunnac<sup>3</sup>, Pham Xuan Hoi<sup>1\*</sup>**

10 *<sup>1</sup>Department of Molecular Pathology, Institute of Agricultural Genetics, Vietnam Academy of*  
11 *Agricultural Sciences, Hanoi, Vietnam.*

12 *<sup>2</sup>Department of Applied Biology and Agriculture, Faculty of Natural Sciences, Quynhon*  
13 *University, Quynhon, Vietnam.*

14 *<sup>3</sup>PHIM Plant Health Institute, Univ Montpellier, IRD, CIRAD, INRAE, Institut Agro,*  
15 *Montpellier, France~~IRD, Cirad, Univ Montpellier, IPME, Montpellier, France.~~*

16 *<sup>4</sup>Vietnam National University of Agriculture, Hanoi, Vietnam.*

17 *<sup>5</sup>ThaiBinh Seed Corporation, Thaibinh, Vietnam.*

18 \* Corresponding author: xuanhoi.pham@gmail.com

19 ¶ These authors contributed equally to this work.

20 <sup>#a</sup> Current address: Faculty of Biology, Hanoi University of Sciences, Hanoi, Vietnam.

## 21 Abstract

22 TBR225 is one of the most popular commercial rice ~~variety~~varieties in Northern  
23 Vietnam. However, this variety is very susceptible to bacterial leaf blight (BLB), a  
24 disease caused by *Xanthomonas oryzae* pv. *oryzae* (*Xoo*) which inflicts important yield  
25 losses. *OsSWEET14* belongs to the ~~*SWEET* (*Sugars Will Eventually be Exported*~~  
26 ~~*Transporter*)~~ gene family that encodes sugar transporters. Together with other Clade III  
27 members, it behaves as a susceptibility (*S*) gene whose induction by Asian *Xoo*  
28 Transcription-Activator-Like Effectors (TALEs) is absolutely necessary for disease. In  
29 this study, we sought to introduce BLB resistance in the TBR225 elite variety. First, two  
30 Vietnamese *Xoo* strains were shown to up-regulate *OsSWEET14* upon TBR225 infection.  
31 To investigate if this induction is connected with disease susceptibility, nine TBR225  
32 mutant lines with mutations in the AvrXa7, PthXo3 or TalF TALEs DNA target  
33 sequences of the *OsSWEET14* promoter were obtained using the CRISPR/Cas9 editing  
34 system. Genotyping analysis of T<sub>0</sub> and T<sub>1</sub> individuals showed that mutations were stably  
35 inherited. None of the examined agronomic traits of three transgene-free T<sub>2</sub> edited lines  
36 were significantly different from those of wild-type TBR225.~~All examined agronomic~~  
37 ~~traits of three transgene free T<sub>2</sub> lines were not significantly different from those of wild-~~  
38 ~~type TBR225.~~ Importantly, one of these T<sub>2</sub> lines, harboring the largest homozygous 6-bp  
39 deletion, displayed decreased *OsSWEET14* expression as well as a significantly reduced  
40 susceptibility to ~~both~~a Vietnamese *Xoo* strains and complete resistance to ~~one~~the other

Formatted: Font: Italic

41 ~~one of them~~. Our finding indicated that CRISPR/Cas9 is a useful and effective approach  
42 to improve BLB resistance of commercial elite rice varieties.

43 **Keywords:** *Bacterial leaf blight; CRISPR/Cas9; Xanthomonas oryzae pv. oryzae;*  
44 *OsSWEET14; TBR225; transgene-free plants.*

45

## 46 **Introduction**

47 Bacterial leaf blight (BLB) caused by *Xanthomonas oryzae* pv. *oryzae* (*Xoo*) is a major  
48 bacterial disease that causes 10%-20% annual reduction in rice production worldwide [1].  
49 The use of improved rice varieties resistant to *Xoo* is probably the most efficient,  
50 economical and environmentally-friendly way to control BLB.

51 The virulence of *Xoo* depends on the transcriptional activation of specific host disease-  
52 susceptibility (*S*) genes by a subgroup of bacterial type III effectors, called transcription  
53 activator-like effectors (TALEs) [2]. Upon translocation into the plant cell, TALEs bind  
54 to specific host nuclear gene promoter sequences termed Effector-Binding Elements  
55 (EBEs) and induce target gene expression to the benefit of the pathogen. The central  
56 repetitive domain of TALEs is responsible for DNA target sequence binding. DNA  
57 binding involves recognition principles that have been largely deciphered and applied to  
58 the computational prediction of TALEs target DNA sequences [3,—4]. This and earlier  
59 work has fostered the identification of TALEs transcriptional targets in the rice genome  
60 and ultimately, of rice BLB *S* genes [2].

61 All *Xoo* strains recurrently target *S* genes belonging to the *SWEET* gene family and  
62 coding for transmembrane sugar exporter proteins [3]. The over accumulation of  
63 *SWEET*s due to TALE induction is presumed to provide an additional ration of  
64 apoplastic carbohydrates for full bacterial pathogen multiplication and disease expression  
65 [5]. Although all five rice clade III *SWEET* genes can function as *S* genes for bacterial

Formatted: Font: (Default) Times New Roman, 13 pt

Formatted: Font: Italic

66 blight, only three, namely *OsSWEET11*, *OsSWEET13* and *OsSWEET14*, are known to be  
67 targeted by several unrelated TALEs in nature [6–11]. *OsSWEET11* is activated by  
68 PthXo1 [6], *OsSWEET13* is targeted by different variants of PthXo2 [11,–12], while  
69 *OsSWEET14* is a target of multiple TAL effectors, including AvrXa7, PthXo3, TalC and  
70 TalF [7–9].

71 Previous studies established that rice ~~recessive~~ resistance to *Xoo* resulting from "TALE-  
72 unresponsive" alleles can be conferred by natural DNA polymorphisms or targeted  
73 editions in EBEs located in *OsSWEET* genes promoters of rice germplasm accessions or  
74 engineered rice varieties, respectively [6,13–16]. For example, early resistance  
75 engineering work has used TALENs to individually alter the AvrXa7, TalC or TalF EBEs  
76 in the *OsSWEET14* promoter and successfully obtained resistance to some Asian *Xoo*  
77 strains [13,15]. However, ~~many~~ strains collected in Asian countries such as China, Japan,  
78 Philippines, Taiwan, Thailand, India, Nepal or South Korea can express combinations of  
79 up to three major TALEs redundantly targeting clade III *OsSWEET* genes with either  
80 PthXo3 or AvrXa7 being ~~often-occasionally~~ associated ~~to~~ with PthXo2 [11,17]. Broad  
81 BLB resistance engineering thus required multiplex *OsSWEET* promoters EBE editing  
82 using the CRISPR/Cas9 system [11,12].

83 The clustered regularly interspaced short palindromic repeats/CRISPR-associated  
84 protein-9 nuclease (CRISPR/Cas9) system is a simple and efficient gene-editing tool  
85 developed in the past few years. Moreover, the targeted mutations generated by  
86 CRISPR/Cas9 can be ~~faithfully and~~ stably transmitted to the next generation. Thus,



87 CRISPR/Cas9 has become a routine tool in plant laboratories around the world to create  
88 various mutants for many applications, including the genetic improvement of crops [18].

89 BLB is a major rice disease which occurs in many rice cultivating areas of Vietnam  
90 [19,20]. Most Vietnamese commercial rice varieties, including TBR225, are susceptible  
91 to BLB, resulting in annual yield loss of about 15 – 30% on average [21]. A few studies  
92 have identified rice resistance genes effective against Vietnamese *Xoo* lineages [20,21].  
93 However, no information is currently available on the nature of Vietnamese *Xoo* TALEs  
94 and their corresponding *S* genes.

95 Despite the large number of mapped rice BLB resistance genes [22], there is a need for  
96 alternative breeding approaches that enable the rapid introduction of broad BLB  
97 resistance in elite varieties in order to cope with swift pathogen populations adaptive  
98 shifts in the fields [11,23].

99 Here, we report on the identification of *OsSWEET14* as a transcriptional target of  
100 Vietnamese *Xoo*. CRISPR/Cas9-mediated mutagenesis of the *OsSWEET14* promoter in  
101 TBR225, a major elite variety in rice production areas of North Vietnam is shown to  
102 confer BLB resistance without detectable yield penalty. ~~For the first time,~~ This study  
103 found this quintessential *S* gene to be associated with the virulence of Vietnamese *Xoo*  
104 strains. This is an important step for the future design and implementation of broad-  
105 spectrum BLB-resistant in elite rice varieties using genome editing in Vietnam.

106

## 107 **Materials and methods**

### 108 **Plant and pathogen materials**

109 Rice cultivar TBR225 (*Oryza sativa* L. ssp. *indica*) were obtained from ThaiBinh Seed  
110 Cor. [24]. All edited and wild-type (WT) TBR225 plants were grown in a net-house  
111 under the following average conditions: 30°C for 14 h (light) and 25°C for 10 h (dark)  
112 with 80% humidity. The *Xoo* VXO\_11 and VXO\_15 strains used in this study were  
113 isolated from diseased leaves collected in Hanoi-Vietnam in 2013 and 2016, respectively.  
114 Bacteria were cultured as described in Zhou et al. (2015) [25].

### 115 **Gene expression analysis**

116 Gene expression analyses were carried out as described previously [26] by RT-PCR  
117 method. The rice leaves were infiltrated with the indicated bacterial strains and used for  
118 total RNA extraction 48 h post inoculation using the TRIzol reagent (Invitrogen, USA).  
119 One microgram of RNA was used for each RT-PCR with oligo (dT) primer followed by  
120 PCR with *OsSWEET14*-specific primers (forward 5'-  
121 ACTTGCAAGCAAGAACAGTAGT-3' and reverse 5'-  
122 ATGTTGCCTAGGAGACCAAAGG-3'). An *Eppendorf Mastercycler ep Gradient S* was  
123 used for 35 PCR cycles. The *OsEF1 $\alpha$*  gene was used as a constitutive control [15] using  
124 specific primers (forward 5'-GAAGTCTCATCCTACCTGAAGAAG-3' and reverse 5'-  
125 GTCAAGAGCCTCAAGCAAGG-3').

126 **gRNA design**

127 The *OsSWEET14* promoter (GenBank, accession number: AP014967.1) was amplified by  
128 PCR with forward primer 5'-TTGCGGCTCATCAGTTTCTC-3' and reverse primer 5'-  
129 CTAGGAGACCAAAGGCGAAG-3' from genomic DNA of TBR225 rice plants and  
130 ligated in pGEM-T Easy vector (Promega) for sequencing. The gRNA target sequence  
131 (Fig 1A) for editing the TBR225 *OsSWEET14* promoter was designed based on the  
132 sequence of the cloned TBR225 *OsSWEET14* promoter using a combination of two  
133 bioinformatics tools CRISPR-P v2.0 (<http://crispr.hzau.edu.cn/CRISPR2/>) and CCTop  
134 (<https://crispr.cos.uni-heidelberg.de/>). The A gRNA sequence with high on-target and  
135 low off-target scores in both prediction tools was chosen for vector construction.

136

137 **Fig 1. CRISPR/Cas9-induced *OsSWEET14* promoter modification in TBR225 rice.**

138 (A) A region of the *OsSWEET14* promoter containing four EBEs (TalC, PthXo3, AvrXa7  
139 and TalF) and putative TATA box from TBR225. The target site (complementary to the  
140 guide RNA) is shown in the box, immediately following the protospacer adjacent motif  
141 (PAM). (B) T-DNA region of the CRISPR/Cas9-mediated genome editing construct  
142 carrying *OsSWEET14*-sgRNA (indicated by the black box). The expression of *Cas9* is  
143 driven by the maize *ubiquitin* promoter (P-Ubi); the expression of the *OsSWEET14*-  
144 sgRNA is driven by the rice *OsU6* promoter (P-*OsU6a*); the expression of *HPT* is driven  
145 by two *CaMV35S* promoters (P-2×35S); T-35S, T-Nos and TTTTTT: gene terminators;  
146 LB and RB: left and right border, respectively. (C) Alignment of the *OsSWEET14*

147 promoter fragment in the nine T<sub>0</sub> transgenic TBR225 rice plants edited in the AvrXa7,  
148 PthXo3 and TalF EBEs. The lines on top of the wild-type sequence represent the binding  
149 sites of AvrXa7, PthXo3 and TalF. The arrow indicates the expected cutting site of the  
150 Cas9 complex used in this study. The labels on the left indicate the name of examined  
151 mutant lines; (a1) and (a2) distinguish alleles in the same line. The numbers on the right  
152 indicate the type of mutation and the number of nucleotides involved; (+) and (-) indicate  
153 insertion and deletion, respectively.

154

## 155 **Vector construction**

156 The Cas9 rice expression vector (pUbi-Cas9) [27] and the sgRNA expression vector  
157 (pENTR-sgRNA) under the control of the *OsU6* promoter [28] were used to construct the  
158 pCas9/OsSWEET14-gRNA expression vector. The complementary oligonucleotides with  
159 appropriate 4-bp overhangs were synthesized by Macrogen (Korea). After heat  
160 denaturation, the complementary oligonucleotides (5'-  
161 gtgtGGTGCTAAGCTCATCAAGCC-3' and 5'-aacGGCTTGATGAGCTTAGCACC-  
162 3') were first annealed to each other, phosphorylated, and ligated into the *Bsa*I-digested  
163 vector pENTR-sgRNA. The integrity of the inserted fragment was verified by  
164 sequencing. Subsequently, the sgRNA cassette was cloned into pUbi-Cas9 using the  
165 Gateway LR clonase (Life Technologies) (Fig 1B). The resulting construct was  
166 confirmed by Sanger sequencing of the insertion junctions.

167

168 ***Agrobacterium*-mediated rice transformation**

169 The pCas9-OsSWEET14-gRNA was electroporated into *Agrobacterium tumefaciens*  
170 EHA105 and the resulting strain was used to transform rice using the method described  
171 by Hiei et al. (1994) [29]. The presence of the transgene in the genome of T<sub>0</sub>  
172 hygromycin-resistant plants or segregating T<sub>1</sub> individuals was evaluated by PCR using 5'-  
173 ATGGCCCCAAAGAAGAAG-3' and 5'- GCCTCGGCTGTCTCGCCA-3' primers  
174 specific for *Cas9*. T<sub>1</sub> individuals were analyzed by PCR using *Cas9*, *OsSWEET14-gRNA*  
175 (5'- GGATCATGAACCAACG-3' and 5'- GAATTCGATATCAAGCTT-3') and *HPT*  
176 (5'-AAACTGTGATGGACGACACCGT-3' and 5'- GTGGCGATCCTGCAAGCTCC -  
177 3') specific diagnostic primer pairs together with a positive control pair (5'-  
178 TTGCGGCTCATCAGTTTCTC-3' and 5'- TGGATCAGATCAAAGGCAAC -3')  
179 specific to the *OsSWEET14* promoter.

180

181 **Bacterial blight inoculation**

182 Rice cultivation and disease assays were done according to the methods of Blanvillain-  
183 Baufumé et al. (2017) [15]. Bacteria were cultured in PSA media (10 g/liter peptone, 10  
184 g/liter sucrose, 1 g/liter glutamic acid, 15 g/liter Bacto Agar) at 28°C for two days [30]  
185 and inoculated at an optical density (OD<sub>600</sub>) of 0.5 (infiltrations) or 0.4 (leaf clipping) in  
186 water. For lesion length measurements, at least three inoculated leaves per plant and three

187 plants for each line were measured 14 days after inoculation (DAI), and scored as  
188 follows: high resistance (lesion length < 8 cm), moderate resistance (lesion length 8-12  
189 cm) and susceptibility (lesion length > 12 cm). For gene expression analyses, 4-cm leaf  
190 sections which were infiltrated with bacterial ~~solution-suspensions~~ were collected at 48 h  
191 after inoculation for RNA extraction. Experiments included samples from three pooled  
192 biological replicate leaves. The plants inoculated with distilled water only were used as  
193 negative controls ~~in all experiments~~.

194

### 195 **Analysis of *OsSWEET14* edited allele sequences**

196 To determine the nature of the mutation at the target site, all transgenic T<sub>0</sub> or T<sub>1</sub> plants  
197 were analyzed by PCR using genomic DNA (50 ng) as a template and *OsSWEET14*  
198 specific primers (5'-TTGCGGCTCATCAGTTTCTC-3' and 5'-  
199 TGGATCAGATCAAAGGCAAC -3'). The PCR products were directly sequenced using  
200 the Sanger method. The sequencing chromatograms were decoded using the Degenerate  
201 Sequence Decoding method [31] in order to identify the mutations.

202

### 203 **Evaluation of major agronomic traits under net-house conditions**

204 WT and selected mutant plants were planted under net-house conditions in a randomized  
205 pot design experiment. At maturity, five plants of each line were investigated for the  
206 following agronomic traits: growth duration, plant height, number of tillers per plant,

207 number of grains per panicle, number of filled grains per panicle and yield (seed mass)  
208 per plant. The experiment was repeated three times, so a total of fifteen plants were  
209 evaluated for each line.

210

## 211 Analysis of potential off-target sequences editing

212 Off-target sequences were predicted by with the CCTop tools ([https://crispr.cos.uni-](https://crispr.cos.uni-heidelberg.de/)  
213 [heidelberg.de/](https://crispr.cos.uni-heidelberg.de/) against the *OsSWEET14* promoter ~~sgRNA~~ and the rice Nipponbare  
214 genome with default parameters. A total of 18 potential off-target sequences were  
215 identified. Three of them ~~, of which 3 were~~ located in coding regions (Table S2). These  
216 regions were amplified by PCR using the specific primers listed in Table S2 and analyzed  
217 by sequencing.

218

## 219 **Results**

### 220 **Vietnamese *Xoo* strains induce *OsSWEET14* during infection of the** 221 **TBR225 rice variety**

222 *OsSWEET14/Os11N3* was previously identified as a susceptibility gene for *Xoo* strains  
223 relying on either of the AvrXa7, PthXo3, TalF (formerly Tal5) or TalC TALEs for  
224 infection of the rice cultivars Nipponbare and Kitaake [11]. Because *Xoo* strains tend to  
225 frequently target this gene, we first sequenced ~~In this study,~~ a region of the *OsSWEET14*

Formatted: Heading 2, Left, Line spacing: single

Formatted: fontstyle01, Font: (Default) Times New Roman, 13 pt

Formatted: fontstyle01, Font: (Default) Times New Roman, 13 pt

Formatted: fontstyle01, Font: (Default) Times New Roman, 13 pt

Formatted: fontstyle01, Font: (Default) Times New Roman, 13 pt, Not Bold, Font color: Auto

Formatted: fontstyle01, Font: (Default) Times New Roman, 13 pt, Not Bold, Font color: Auto

Formatted: fontstyle01, Font: (Default) Times New Roman, 13 pt

Formatted: Font: Italic

226 promoter from rice cultivar TBR225 ~~was sequenced~~ to examine if it also carries  
227 documented target EBEs. Based on the Nipponbare genome sequence in database  
228 (AP014967.1), the region encompassing 1343 bp sequence upstream and 52 bp sequence  
229 downstream of the predicted transcription start site of *OsSWEET14* gene from TRB225  
230 rice cultivar was PCR amplified and sequenced (S1 Fig). The promoter region including  
231 the putative TATA box (TATAAA) and the AvrXa7, PthXo3, TalF/Tal5 and TalC EBEs  
232 (Fig 1A), located 319 bp to 216 bp upstream of the ATG initiation codon, showed 100%  
233 identity to the Nipponbare sequence. This therefore implied that in principle, the TBR225  
234 *OsSWEET14* promoter can be recognized by characterized major *Xoo* TALEs.

235 As illustrated by the representative experiment of Fig 2A, we also challenged TBR225  
236 plants with two Vietnamese *Xoo* strains VXO\_11 and VXO\_15, both originating from the  
237 Hanoi province, using leaf clipping assays. We consistently obtained typical extended  
238 disease lesions 14 days after inoculation (25.5 cm and 26.6 cm average lesions length for  
239 VXO\_11 and VXO\_15, respectively in the experiment of S2 Fig), indicating that the  
240 TBR225 variety is susceptible to BLB.

241 To test if *OsSWEET14* is a potential direct virulence target of Vietnamese *Xoo* strains, we  
242 infiltrated TBR225 rice leaves with the two Vietnamese *Xoo* strains. Forty-eight hours  
243 post infiltration, TBR225 plants inoculated with VXO strains displayed a strong  
244 induction of *OsSWEET14* relative to water controls (Fig 2B). These results suggest that  
245 *OsSWEET14* is a transcriptional target of VXO strains and that it may act as a  
246 susceptibility gene in TBR225.



247

248 **Fig 2. *OsSWEET14* is likely a susceptibility gene for Vietnamese *Xoo* strains in rice**  
249 **cultivar TBR225.** (A) Representative images of the disease lesions obtained 14 days  
250 after leaf clipping inoculation of TBR225 rice leaves with Vietnamese *Xoo* strains  
251 VXO\_11 and VXO\_15 or with water (CT). The chevrons above the leaves indicate the  
252 maximum visible extent of lesions away from the inoculation point on the left (B).  
253 *OsSWEET14* expression pattern obtained by RT-PCR two day post-infiltration of  
254 TBR225 rice leaves with Vietnamese *Xoo* strains. CT Plants were inoculated with water  
255 only. The experiment was repeated three times.

256

### 257 **CRISPR/Cas9 design for *OsSWEET14* promoter editing**

258 Our main objective was to engineer resistance to BLB caused by Vietnamese *Xoo* strains.  
259 To this end, we subsequently sought to specifically modify the *OsSWEET14* promoter in  
260 TBR225 rice with CRISPR/Cas9-mediated editing. Previous work revealed that while  
261 African *Xoo* strains rely on TalC and occasionally, TalF, all Asian *Xoo* strains use either  
262 PthXo3- or AvrXa7-like TALEs to activate *OsSWEET14* [11]. Because the *talC* gene is  
263 currently exclusively found in African strains, we reasoned that it is unlikely that  
264 Vietnamese strains carry a *talC* copy. Thus, to maximize our chances to perturb all  
265 remaining documented EBEs, we selected a 20-bp nucleotide target site overlapping the  
266 PthXo3, AvrXa7 and TalF EBEs and having a predicted cut site located near the 3'-end of

267 the AvrXa7 EBE (Fig 1A). The recombinant binary plasmid pCas9/OsSWEET14-gRNA  
 268 for CRISPR/Cas9 mediated editing of *OsSWEET14* was transformed into the rice variety  
 269 TBR225 via *Agrobacterium*-mediated transformation (S1 Table). A total of nine TBR225  
 270 transformants were selected from 10 independent PCR-validated transgenic T<sub>0</sub> TBR225  
 271 plants to further investigate CRISPR/Cas9-targeted mutagenesis of the *OsSWEET14*  
 272 promoter. In order to decipher the nature of the editing events in *OsSWEET14*, the  
 273 promoter sequencing data of transgenic lines were analyzed using the Degenerate  
 274 Sequence Decoding software [31]. All 9 T<sub>0</sub> transgenic plants harbored at least an edition  
 275 event (Fig 1C): two were heterozygous mutant/wild type, two had homozygous  
 276 mutations, and five had bi-allelic mutations. Regarding the type of mutations, 66.7%  
 277 were nucleotide deletions, 11.1% of the mutations were nucleotide insertions and no  
 278 substitution was detected (Table 1).

279  
 280 **Table 1. Frequencies of mutant genotypes and target mutation types in T<sub>0</sub>**  
 281 **transgenic plants.**

| Mutant genotype ratios <sup>a</sup> (%) |            |            | Mutation type ratios <sup>b</sup> (%) |             |              |
|-----------------------------------------|------------|------------|---------------------------------------|-------------|--------------|
| Heterozygote                            | Homozygote | Bi-allelic | Deletion                              | Insertion   | Substitution |
| 22.2 (2/9)                              | 22.2 (2/9) | 55.6 (5/9) | 66.7 (12/18)                          | 11.1 (2/18) | 0 (0/18)     |

<sup>a</sup> (Number of on-target mutant genotype/total number of on-target mutant genotypes) x 100%.

<sup>b</sup> (Number of allele mutation type/number of all allele mutation types) x 100%.

283 **Inheritance of CRISPR/Cas9-induced mutations in the T<sub>1</sub>**  
 284 **generation**

285 To assess the inheritance of the CRISPR/Cas9-induced *OsSWEET14* mutations in the  
 286 next generation, all T<sub>0</sub> mutant transgenic plants (Fig 1C) were allowed to self-pollinate,  
 287 and T<sub>1</sub> transgenic plants were randomly selected in the progeny of T<sub>0</sub> plants for  
 288 sequencing and analysis of their edited site (Table 2). All T<sub>1</sub> individuals derived from T<sub>0</sub>  
 289 plants previously genotyped as homozygous possessed the same allele as their parent,  
 290 suggesting stable inheritance of the mutations to the next generation. Similarly, the T<sub>1</sub>  
 291 progeny of each of both bi-allelic and heterozygous mutation T<sub>0</sub> lines showed a  
 292 segregation ratio which is consistent with Mendelian segregation ( $\chi^2 < \chi^2_{0.05, 2} = 5.99$ ),  
 293 indicating that the CRISPR/Cas9-induced mutations in T<sub>0</sub> plants were transmitted as  
 294 expected to the next generation. Interestingly, no new mutant allele was detected in the T<sub>1</sub>  
 295 generation of both heterozygous mutants L-21 and L-27, even though most of them still  
 296 carried the transgene. Overall, consistent with previous similar studies, our results  
 297 indicate that the CRISPR/Cas9-mediated mutations generated here are stably transmitted  
 298 to the next generation in a Mendelian fashion.

299 **Table 2. Transmission of CRISPR/Cas9 editing events to the T<sub>1</sub> generation.**

| T <sub>0</sub> plant | Genotype | Allele(s) | No. of T <sub>1</sub> plants tested | Mutation inheritance in the T <sub>1</sub> generation |                  | No. of T-DNA-free plants |
|----------------------|----------|-----------|-------------------------------------|-------------------------------------------------------|------------------|--------------------------|
|                      |          |           |                                     | Alleles segregation                                   | $\chi^2$ (1:2:1) |                          |

|      |              |       |    |                             |       |         |
|------|--------------|-------|----|-----------------------------|-------|---------|
| L-4  | Bi-allelic   | -5/-3 | 32 | 10 (-5), 18 (-5/-3), 4 (-3) | 2,750 | 5 (2*)  |
| L-5  | Bi-allelic   | -6/+1 | 44 | 9 (-6), 22 (-6/+1), 13 (+1) | 0,727 | 10 (2*) |
| L-7  | Bi-allelic   | -4/-3 | 38 | 14 (-4), 17 (-4/-3), 7 (-3) | 3,000 | 11 (4*) |
| L-15 | Homozygote   | +1    | 5  | 5 (+1)                      | -     | 1 (1*)  |
| L-21 | Heterozygote | -3    | 26 | 3 (-3), 13 (-3/wt), 10 (wt) | 3,769 | 7 (1*)  |
| L-27 | Bi-allelic   | -5/-4 | 7  | 1 (-5), 3(-5/-4), 3 (-4)    | 1,286 | 0       |
| L-29 | Heterozygote | -5    | 33 | 6 (-5), 19 (-5/wt), 8 (wt)  | 1,000 | 2 (0*)  |
| L-31 | Homozygote   | -3    | 15 | 15 (-3)                     | -     | 5 (5*)  |
| L-54 | Bi-allelic   | -3/-2 | 21 | 3 (-3), 12 (-3/-2), 6(-2)   | 1,286 | 3 (0*)  |

“+” and “-” indicate respectively, insertion and deletion, of the indicated number of nucleotides.

“w”, wild type.

\*Number of homozygous mutant plants without T-DNA.

300

### 301 Selection of transgene-free mutant TBR225 rice lines

302 To identify T-DNA free T<sub>1</sub> rice plants containing a mutation in EBEs of the *OsSWEET14*  
303 promoter, PCR analysis was carried out using primers specific to *Cas9*, sgRNA and *HPT*  
304 sequences (Table 2). A T<sub>1</sub> individual was considered devoid of the transgene if the  
305 control amplification of the *OsSWEET14* promoter was successful and if none of the PCR  
306 reactions with independent primer pairs designed on the T-DNA produced a detectable  
307 diagnostic band. The results of this PCR screen show that the T-DNA could be  
308 segregated out in the progeny of most T<sub>0</sub> lines, with 88.9% of the T<sub>0</sub> lines generating T-  
309 DNA-free progeny. In total, 44 of 221 analyzed edited T<sub>1</sub> plants did not generate a  
310 specific amplicon from the T-DNA construct and 15 of them were homozygous mutant

Formatted: Font: Italic

311 harboring the desired *OsSWEET14* modifications. Our results demonstrate that transgene-  
312 free, homozygous mutant individuals could be obtained in the segregating progeny of  
313 selfed T<sub>0</sub> individuals.

314

315 **TBR225 *OsSWEET14* promoter editing confers resistance to**  
316 **Vietnamese *Xoo***

317 To characterize the BLB-resistance phenotype of the generated rice mutants, three T-  
318 DNA-free, homozygous TBR225 edited lines, namely, L-5.7(-6), L-31.12(-3) and L-  
319 15.4(+1) with *OsSWEET14* promoter alleles corresponding respectively to L-5-a1 (6bp  
320 deletion), L-31 (3bp deletion) and L-15 (1bp insertion) in Fig 1C, were established.  
321 Selected T<sub>1</sub> individuals were propagated to obtain T<sub>2</sub> seeds which were used to perform  
322 BLB susceptibility assays. Edited T<sub>2</sub> and WT TBR225 plants were inoculated by leaf-  
323 clipping with the VXO\_11 and VXO\_15 strains at the eight-week stage. The inoculated  
324 leaves of wild type TBR225 plants and of edited lines L-15.4(+1) and L-31.12(-3)  
325 developed long water-soaked lesions typical of BLB, ranging from 18.3 cm to 29.0 cm in  
326 length. In contrast, the edited line L-5.7(-6), harboring a longer 6-bp deletion at the target  
327 site, displayed high (1.2 cm average lesion length) and moderate (7.3 cm average lesion  
328 length) resistance to VXO\_11 and VXO\_15 strains, respectively (Fig 3). Means  
329 comparisons with a Tukey's HSD test further indicated that irrespective of the inoculated  
330 strain, the mean lesion lengths measured on the L-15.4(+1), L-31.12(-3) or wild type

331 lines were not significantly different. In contrast, the mean lesion lengths recorded on the  
332 L-5.7(-6) mutant line were significantly different from those obtained on the wild type  
333 and the two other edited lines challenged with either of the Vietnamese strains (Fig 3B).

334 Furthermore, our off-target editing analysis on line L-5.7(-6) did not reveal unintended  
335 modifications of other annotated rice loci (Table S2 and Figure S5), indicating that the 6-  
336 bp deletion in the *OsSWEET14* promoter is probably responsible for this phenotype.

Formatted: Font: Italic

337 Consistent with disease assays and as shown in Figure 3C, whereas a semiquantitative  
338 RT-PCR signal for *OsSWEET14* expression was detected on the parental variety and the  
339 L-15.4(+1) and L-31.12(-3) edited lines following VXO 11 and VXO 15 infiltration,  
340 this amplicon was undetectable in the resistant L-5.7(-6) line.

Formatted: Font: Italic

341

342 In conclusion, this data shows that ~~whereas the~~ a 6-bp deletion in the AvrXa7/PthXo3  
343 EBE reduces dramatically *OsSWEET14* expression following VXO strains inoculation

Formatted: Font: Italic

344 and confers ~~measureable~~ resistance to ~~VXO~~these strains. In contrast, shorter  
345 modifications on the 3'-end of this EBE are insufficient to perturb *OsSWEET14*  
346 expression after inoculation and do not confer detectable protection ~~to~~against the

347 corresponding strains. ~~Furthermore~~Finally, while these results strongly support the view  
348 that *OsSWEET14* functions as a unique susceptibility gene in the interaction between

349 strain VXO\_11 and the TBR225 rice variety, the resistance to strain VXO\_15 is not as  
350 dramatic and may suggest that other mechanisms partially counteract the effects of the

351 AvrXa7/PthXo3 EBE 6-bp deletion in edited TBR225 plants.

352

353 **Fig 3. BLB resistance assays for homozygous mutant rice lines L-5.7(-6), L-15.4(+1)**

354 **and L-31.12(-3).** (A) Leaves were photographed 14 days post-leaf clipping inoculation of

355 *Xoo* strains VXO\_11 and VXO\_15; arrow heads indicate the end of the lesion. (B) Mean

356 lesion lengths (bars) and standard deviations (error bars). Values were measured 14 days

357 post-leaf clipping inoculation of two *Xoo* strains VXO\_11 and VXO\_15 and were

358 computed from at least three leaves from each of three plants. Asterisks indicate

359 significant differences relative to wild type plants (Tukey's HSD test;  $**P < 0.05$ ). The

360 number in the parentheses following the line name indicates the type of mutation and the

361 number of nucleotides involved. The letters above strain labels indicate susceptibility

362 score (R - high resistance; M – moderate resistance; S - susceptibility). The experiment

363 was repeated three times. (C) *OsSWEET14* expression pattern obtained by RT-PCR two

364 day post-infiltration of genome edited homozygous mutant rice lines L-31.12(-3), L-

365 15.4(+1) and L-5.7(-6) and parental TBR225 rice leaves with Vietnamese *Xoo* strains.

366 This experiment was repeated two times with similar results.

367

368

369 **TBR225 *OsSWEET14* promoter edited lines agronomic**

370 **performances are undistinguishable from the parental variety**

Formatted: Font: Not Bold

371 To determine if ~~and how~~ mutations in the *OsSWEET14* promoter affect agronomic traits  
 372 of TRB225 rice plants, three independent homozygous mutant lines were analyzed by  
 373 measuring their growth duration, plant height, number of tillers per plant, number of  
 374 grains per panicle, number of filled grains per panicle, yield per plant and amylose  
 375 content under net-house conditions (see picture of S3 Fig). ANOVA tests and Student's *t*  
 376 tests showed that the mutant lines displayed no significant difference to TBR225, in  
 377 terms of the examined agronomic traits, under our net-house conditions (Table 3). These  
 378 results suggest that the tested CRISPR/Cas9-induced mutations in the *OsSWEET14*  
 379 promoter did not negatively impact the main agronomic traits of TBR225.

380

381 **Table 3. Agronomic traits evaluation of homozygous T<sub>2</sub> mutant lines.**

| Lines       | Growth duration (day)    | Plant height (cm)       | No. of tillers per plant | No. of grains per panicle | No. of filled grains per panicle | Amylose content (%)      |
|-------------|--------------------------|-------------------------|--------------------------|---------------------------|----------------------------------|--------------------------|
| WT          | 108.4 ± 1.1 <sup>a</sup> | 86.6 ± 3.2 <sup>a</sup> | 5 ± 0.7 <sup>a</sup>     | 144.4 ± 4.9 <sup>a</sup>  | 125 ± 4.5 <sup>a</sup>           | 13.2 ± 0.38 <sup>a</sup> |
| L-5.7(-6)   | 108 ± 1.2 <sup>a</sup>   | 86.4 ± 4.3 <sup>a</sup> | 5.2 ± 0.4 <sup>a</sup>   | 144.2 ± 4.4 <sup>a</sup>  | 123.4 ± 5.5 <sup>a</sup>         | 13.7 ± 0.35 <sup>a</sup> |
| L-15.4(+1)  | 107.8 ± 0.8 <sup>a</sup> | 86.4 ± 5.0 <sup>a</sup> | 4.8 ± 0.4 <sup>a</sup>   | 147.8 ± 5.1 <sup>a</sup>  | 121.8 ± 3.0 <sup>a</sup>         | 13.5 ± 0.41 <sup>a</sup> |
| L-31.12(-3) | 108 ± 1.2 <sup>a</sup>   | 88.4 ± 4.3 <sup>a</sup> | 5.4 ± 0.5 <sup>a</sup>   | 144.6 ± 5.3 <sup>a</sup>  | 124.2 ± 7.4 <sup>a</sup>         | 13.8 ± 0.21 <sup>a</sup> |

Five plants per line were measured. Experiments were repeated three time.  
 Means followed by the same letter do not differ significantly ( $P < 0.05$ ).

382

383

## 384 Discussion

385 Recently, the CRISPR/Cas9 system has emerged as a powerful tool for gene editing in  
 386 many organisms including plants. Because of its specificity and efficiency, this system



387 has been widely used to improve important agronomic traits of major crops such as rape,  
388 tomato, soybean, rice, wheat and maize [32]. Excluding easy-to-transform reference  
389 accessions such as Nipponbare and Kitaake that are widely used in the laboratory, the  
390 number of reports on the improvement of agriculturally relevant elite rice cultivars for  
391 pertinent traits using the CRISPR/Cas9 technology (see for example [33–36]) is gradually  
392 increasing but is still limited.

393 TBR225 [24], a major commercial rice variety cultivated in large areas of Northern  
394 Vietnam, has the advantages of early maturity, high and stable yield, as well as cooking  
395 quality. However, it is very susceptible to BLB. Here, the CRISPR/Cas9-mediated  
396 editing method was applied in order to rapidly improve the BLB resistance of TBR225 by  
397 modifying the AvrXa7, PthXo3 and TalF EBEs on the promoter of *OsSWEET14*. Of the  
398 three generated homozygous mutant lines tested for resistance, the one carrying the  
399 largest deletion at the target site (6 bp) showed a significantly improved resistance to  
400 infection with two *Xoo* strains VXO\_11 and VXO\_15. Therefore, using the major  
401 commercial rice variety TBR225 as an example, we illustrate the advantages of  
402 CRISPR/Cas9 tool for rice breeding.

403 In the present study, the frequency of individuals with CRISPR/Cas9-induced mutations  
404 in T<sub>0</sub> transgenic plants was 90%, which is similar to previous observation [28]. We  
405 obtained only two heterozygous mutant/wild type lines versus seven homozygous or bi-  
406 allelic mutant lines. This high frequency of mutated alleles is another proof that the  
407 CRISPR/Cas9 system is indeed an efficient tool for gene editing in plant. We also

408 observed the stable transmission of edited alleles to subsequent generations. This is a  
409 common phenomenon that has been repeatedly documented for rice plants carrying  
410 CRISPR/Cas9-induced mutations [33,35]. In this study, we obtained only two types of  
411 induced mutations ~~were observed~~ in T<sub>0</sub> plants: ~~single nucleotide~~ insertion (11.1%) and  
412 deletion (66.7%), ~~but no substitution or combinations of the different mutation types were~~  
413 observed. In some earlier studies, new mutations were continuously obtained in the T<sub>1</sub>  
414 offspring of heterozygous T<sub>0</sub> mutants because ~~of the continuous activity of the~~  
415 ~~CRISPR/Cas9 complex remains active on edited targets until the seed or PAM~~  
416 ~~regions system cease to be functional~~ [35,37,38]. In contrast, here, all the T<sub>1</sub> plants  
417 generated from both heterozygous lines L-21 and L-29, regardless of whether they had a  
418 CRISPR/Cas9 T-DNA transgene integrated in their genome, did not show any new  
419 mutation possibly because CRISPR/Cas9 T-DNA transgene was no longer functional.  
420 We could also readily obtain transgene-free plants from most of the T<sub>1</sub> segregation  
421 populations without any laborious crossing or backcrossing steps, which illustrates an  
422 advantage of the CRISPR/Cas9 technology compared to conventional breeding.

423 Clade III SWEET family proteins are involved in a number of biological processes such  
424 as seed and pollen development or pathogen susceptibility [39]. Their inactivation has  
425 previously been shown to cause pleiotropic and/or detrimental effects. For example, both  
426 *ossweet11* single and *ossweet11-ossweet15* double Kitaake rice mutants showed defects  
427 in endosperm development and filling [40]. In addition, RNA-mediated silencing of  
428 either *Os11N3/OsSWEET14* [7] or *Os8N3/OsSWEET11* [6] in BLB resistant Kitaake

Formatted: Not Highlight

Formatted: Not Highlight

Field Code Changed

Formatted: Check spelling and grammar, Not Superscript/ Subscript

Field Code Changed

Field Code Changed

Formatted: Not Superscript/ Subscript

Field Code Changed

Formatted: Not Superscript/ Subscript

429 lines causes negative effects on seed production. In contrast, here, we show that T-DNA-  
430 free TBR225 plants harboring homozygous mutations generated with the CRISPR/Cas9  
431 system in the AvrXa7/PthXo3 EBE of the *OsSWEET14* promoter exhibited enhanced  
432 *Xoo* resistance but did not show any significant difference in all examined agronomic  
433 traits compared to wild-type plants under net-house growth conditions. It is conceivable  
434 that limited modifications in promoter regions do not affect the normal expression of  
435 *SWEET* genes in contrast to KO or silenced lines. Our findings are consistent with the  
436 previous work of Oliva et al. [11] who studied 30 combinations of EBE mutations in the  
437 *OsSWEET11*, *OsSWEET13* and *OsSWEET14* promoters of the IR64 or Ciherang-Sub1  
438 varieties and detected only a single line with abnormal agronomic traits.

439 Some individual *Xoo* strains have evolved a set of distinct TALE effectors that  
440 collectively target several members of the clade III *SWEET* family. The presence of these  
441 redundant TALEs thereby trumps single “~~loss-loss-of-of-tale-tale~~ responsiveness”  
442 resistance alleles [11,12,17,41]. For example, Kitaake lines carrying TALEN-induced  
443 mutation in the *SWEET14* promoter [13,15] exhibit resistance to strains which depend  
444 exclusively on matching AvrXa7/PthXo3 for clade III *SWEET* family induction.

445 Likewise, the natural *xa13* allele [42] or CRISPR/Cas9-induced mutation in the  
446 *SWEET11* promoter [11] exhibit resistance to strains such as PXO99 which depend  
447 exclusively on PthXo1, for virulence. However, the BLB resistance of the Kitaake lines  
448 harboring mutations in both AvrXa7/PthXo3 (*OsSWEET14*) and PthXo1 (*OsSWEET11*)  
449 EBEs ~~were-was~~ defeated by *Xoo* strains expressing simultaneously the AvrXa7/PthXo3

Field Code Changed

Formatted: Not Superscript/ Subscript

Formatted: Not Superscript/ Subscript

Field Code Changed

450 and PthXo2B TALEs [11]. Recently, the stacking of EBE-edited alleles in several  
451 *OsSWEET* promoters have overcome this limitation and was shown to achieve a broad  
452 spectrum of resistance to strains from most BLB-prone countries in Asia [11,12].

453 All of the three T<sub>2</sub> lines tested for BLB resistance were affected ~~only~~ for the  
454 AvrXa7/PthXo3 EBE and conserved an otherwise wild type TalF EBE (Fig 1C). The  
455 homozygous mutant TBR225 line L-5.7(-6) carrying a 6-bp deletion in the  
456 AvrXa7/PthXo3 EBE exhibited a significantly enhanced resistance to two Vietnamese  
457 *Xoo* strains compared to WT TBR225. The L-15.4(+1) and L-31.12(-3) lines that  
458 harbored more subtle alterations in the 3'-end of this EBE (a 1-bp insertion and a 3-bp

459 deletion, respectively) in contrast remained susceptible to VXO strains. Our *OsSWEET14*  
460 expression analysis after Vietnamese *Xoo* strains inoculation (Fig 1C) suggests ~~It is~~  
461 ~~therefore possible~~ that these editing events did not alter the EBE sequence sufficiently to  
462 compromise promoter recognition by an AvrXa7/PthXo3-like Vietnamese TALE. With  
463 less than 2 cm average lesion length, the resistance of line L-5.7(-6) (6-bp deletion) to the  
464 VXO\_11 strain is rather extreme (versus average lesion length of 20.1 cm on wild type

465 plants). Moreover, in this line, *OsSWEET14* expression following bacterial inoculation is  
466 strongly reduced relative the parental line and the two other edited lines, which suggest  
467 that in this case, recognition by an AvrXa7/PthXo3-like Vietnamese TALE is abrogated.

468 Consistent with ~~this interpretation,~~ *OsSWEET14* expression analysis and as shown in S4  
469 Fig, the Talvez [43] target prediction scores for AvrXa7 and PthXo3 on the *OsSWEET14*  
470 promoter L-5-a1 allele sequence of line L-5.7(-6) are markedly lower than on the wild

Formatted: Font: Italic, Not Superscript/ Subscript

Formatted: Font: Italic, Not Superscript/ Subscript

Formatted: Font: Italic, Not Superscript/ Subscript

Field Code Changed

Formatted: Not Superscript/ Subscript

471 type promoter sequence. This is not the case however for the edited alleles carried by  
472 lines L-15.4(+1) and L-31.12(-3) (respectively L-15 and L-31 in S4 Fig) whose Talvez  
473 scores are identical or slightly lower than those of the wild type promoter sequence.

474 The magnitude of the effect of the 6-bp deletion allele on susceptibility to VXO\_11 is  
475 comparable to the dramatic effect of previously characterized alterations of the same  
476 EBEs in the Kitaake background against the PXO86 strain that possesses a single TALE,  
477 AvrXa7, targeting *OsSWEET14* for clade III *OsSWEET* gene induction [15]. By analogy,  
478 this suggests that *OsSWEET14* is also the only clade III *OsSWEET*s target of VXO\_11 in  
479 the TBR225 background but, in order to confirm this hypothesis an examination of other  
480 clade III *OsSWEET*s ~~genes expression-induction~~ patterns in response to this strain would  
481 be required. The situation with the VXO\_15 strain is not as straightforward to interpret  
482 and will require further investigations. Although the 6-bp deletion in the AvrXa7/PthXo3  
483 EBE did provide an increased resistance to the edited plants, the VXO\_15 strain caused  
484 intermediate disease severity ~~was still intermediate against the VXO\_15 strain~~ (7.3 cm  
485 average lesion length on Fig 3). This incomplete resistance is unlikely to ~~could~~ result  
486 from the partial but still productive recognition of subsequences of the altered EBE by a  
487 VXO\_15 AvrXa7/PthXo3-like TALE ~~because *OsSWEET14* expression is similarly~~  
488 decreased in response to either this strain or VXO\_11 (Fig 3C). Alternatively, ~~analogous~~  
489 to other Asian strains, VXO\_15 may encode additional alternative TALEs, such as  
490 PthXo2B or PthXo1 that compensate the putative loss of *OsSWEET14* induction by  
491 targeting other clade III *OsSWEET* genes. ~~C~~ontrary to all Asian *Xoo* examined so far,

Formatted: Font: Italic, Not Superscript/ Subscript

492 ~~(and thus less likely)~~ but similar to African *Xoo* [15], VXO\_15 may have the intrinsic  
493 potential to cause disease in the absence of clade III *OsSWEET* gene induction. More  
494 likely, analogous to other Asian strains, VXO 15 may encode alternative TALEs, such as  
495 PthXo2B or PthXo1 that compensate the loss of *OsSWEET14* induction by targeting  
496 other clade III *OsSWEET* genes. In this regard, long read genome sequencing will  
497 ultimately help describe ~~These results nonetheless suggest that there are at least two~~  
498 ~~groups within Vietnamese *Xoo* in terms of TALEs diversity~~ variability in Vietnamese *Xoo*  
499 strains.

500 In conclusion, we showed that editing specific EBEs of *Xoo* TALEs via CRISPR/Cas9  
501 tool is an efficient method for improving BLB resistance of elite rice varieties such as  
502 TBR225 without detectable yield penalties. This also uncovered the potential diversity of  
503 TALEs in Vietnamese *Xoo* population, which will thus require future investigations to  
504 address the TALE repertoires of Vietnamese *Xoo* strains in order to generate broad-  
505 spectrum BLB-resistant rice varieties in Vietnam.

506

## 507 **Authors' Contributions**

508 Nguyen Duy Phuong and Tran Lan Dai are equal contributors

509 **Conceptualization:** Pham Xuan Hoi, Sebastien Cunnac, Nguyen Duy Phuong

510 **Data Curation:** Nguyen Duy Phuong

511 **Formal Analysis:** Nguyen Duy Phuong, Tran Lan Dai, Sebastien Cunnac, Pham Xuan

512 Hoi

513 **Funding Acquisition:** Nguyen Duy Phuong, Pham Xuan Hoi, Tran Manh Bao

514 **Investigation:** Nguyen Duy Phuong, Tran Lan Dai, Pham Thu Hang, Phung Thi Thu

515 Huong, Nguyen Thanh Ha, Pham Phuong Ngoc, Florence Auguy, Sebastien Cunnac

516 **Methodology:** Nguyen Duy Phuong, Tran Lan Dai, Pham Thu Hang, Sebastien Cunnac,

517 Nguyen Thanh Ha, Pham Xuan Hoi

518 **Project Administration:** Pham Xuan Hoi

519 **Resources:** Pham Thu Hang, Florence Auguy, Nguyen Thanh Ha

520 **Supervision:** Sebastien Cunnac, Pham Xuan Hoi

521 **Validation:** Sebastien Cunnac, Pham Xuan Hoi

522 **Writing – Original Draft Preparation:** Nguyen Duy Phuong, Tran Lan Dai

523 **Writing – review & editing:** Sebastien Cunnac, Pham Xuan Hoi, Tran Manh Bao, Bui

524 Thi Thu Huong

525

## 526 **Acknowledgments**

527 We are grateful to Msc. Pham Thi Van, Dr. Cao Le Quyen and Dr. Nguyen Van Cuu

528 from the Institute of Agricultural Genetics for rice transformation experiments, Msc.

529 Nguyen Thi Thu Ha from the Institute of Agricultural Genetics for managing the *Xoo*  
530 strains collection and Msc. Nguyen Thi Nhung from Thaibinh Seeds Cor. for kindly  
531 providing the rice accessions.

532



533

534 **References**

- 535 1. [Zhang H, Wang S. Rice versus \*Xanthomonas oryzae\* pv. \*oryzae\*: A unique](#)  
536 [pathosystem. \*Curr Opin Plant Biol.\* 2013; 16\(2\):188-195.](#)  
537 [doi:10.1016/j.pbi.2013.02.008 PMID: 23466254](#)~~Zhang H, Wang S. Rice versus~~  
538 ~~*Xanthomonas oryzae* pv. *oryzae*: A unique pathosystem. *Curr Opin Plant Biol.*~~  
539 ~~2013;16(2):188-195. doi:10.1016/j.pbi.2013.02.008~~
- 540 2. [White FF, Potnis N, Jones JB, Koebnik R. The type III effectors of \*Xanthomonas\*.](#)  
541 [Mol Plant Pathol. 2009; 10\(6\):749-766. doi:10.1111/j.1364-3703.2009.00590.x](#)  
542 [PMID: 19849782](#)
- 543 3. [Boch J, Bonas U, Lahaye T. TAL effectors - pathogen strategies and plant](#)  
544 [resistance engineering. \*New Phytol.\* 2014; 204\(4\):823-832. doi:10.1111/nph.13015](#)  
545 [PMID: 25539004](#)
- 546 4. [Bogdanove AJ, Schornack S, Lahaye T. TAL effectors: Finding plant genes for](#)  
547 [disease and defense. \*Curr Opin Plant Biol.\* 2010; 13\(4\):394-401.](#)  
548 [doi:10.1016/j.pbi.2010.04.010 PMID: 20570209](#)
- 549 5. [Bezruczyk M, Yang J, Eom JS, Prior M, Sosso D, Hartwig T, Szurek B, Oliva R,](#)  
550 [Vera-Cruz C, White FF, Yang B, Frommer WB. Sugar flux and signaling in plant-](#)  
551 [microbe interactions. \*Plant J.\* 2018; 93\(4\):675-685. doi:10.1111/tpj.13775 PMID:](#)  
552 [29160592](#)

Formatted: Justified

- 553 6. Yang B, Sugio A, White FF. *Os8N3* is a host disease-susceptibility gene for  
554 bacterial blight of rice. Proc Natl Acad Sci U S A. 2006; 103(27):10503-10508.  
555 doi:10.1073/pnas.0604088103 PMID: 16798873
- 556 7. Antony G, Zhou J, Huang S, Li T, Liu B, White F, Yang B. Rice *xa13* recessive  
557 resistance to bacterial blight is defeated by induction of the disease susceptibility  
558 gene *Os11N3*. Plant Cell. 2010; 22(11):3864-3876. doi:10.1105/tpc.110.078964  
559 PMID: 21098734
- 560 8. Yu Y, Streubel J, Balzergue S, Champion A, Boch J, Koebnik R, Feng J, Verdier  
561 V, Szurek B. Colonization of rice leaf blades by an African strain of *Xanthomonas*  
562 *oryzae* pv. *oryzae* depends on a new TAL effector that induces the rice nodulin-3  
563 *Os11N3* gene. Mol Plant-Microbe Interact. 2011; 24(9):1102-1113.  
564 doi:10.1094/MPMI-11-10-0254 PMID: 21679014.
- 565 9. Streubel J, Pesce C, Hutin M, Koebnik R, Boch J, Szurek B. Five phylogenetically  
566 close rice *SWEET* genes confer TAL effector-mediated susceptibility to  
567 *Xanthomonas oryzae* pv. *oryzae*. New Phytol. 2013; 200(3):808-819.  
568 doi:10.1111/nph.12411 PMID: 23879865
- 569 10. Zhou J, Peng Z, Long J, Sosso D, Liu B, Eom JS, Huang S, Liu S, Vera Cruz C,  
570 Frommer WB, White FF, Yang B. Gene targeting by the TAL effector PthXo2  
571 reveals cryptic resistance gene for bacterial blight of rice. Plant J. 2015; 82(4):632-  
572 643. doi:10.1111/tpj.12838 PMID: 25824104

- 573 11. Oliva R, Ji C, Atienza-Grande G, Huguet-Tapia JC, Perez-Quintero A, Li T, Eom  
574 JS, Li C, Nguyen H, Liu B, Auguy F, Sciallano C, Luu VT, Dossa GS, Cunnac S,  
575 Schmidt SM, Slamet-Loedin IH, Vera Cruz C, Szurek B, Frommer WB, White FF,  
576 Yang B. Broad-spectrum resistance to bacterial blight in rice using genome editing.  
577 Nat Biotechnol. 2019; 37(11):1344-1350. doi:10.1038/s41587-019-0267-z PMID:  
578 31659337
- 579 12. Xu Z, Xu X, Gong Q, Li Z, Li Y, Wang S, Yang Y, Ma W, Liu L, Zhu B, Zou L,  
580 Chen G. Engineering broad-spectrum bacterial blight resistance by simultaneously  
581 disrupting variable TALE-binding elements of multiple susceptibility genes in rice.  
582 Mol Plant. 2019; 12(11):1434-1446. doi:10.1016/j.molp.2019.08.006 PMID:  
583 31493565
- 584 13. Li T, Liu B, Spalding MH, Weeks DP, Yang B. High-efficiency TALEN-based  
585 gene editing produces disease-resistant rice. Nat Biotechnol. 2012; 30(5):390-392.  
586 doi:10.1038/nbt.2199 PMID: 22565958
- 587 14. Hutin M, Pérez-Quintero AL, Lopez C, Szurek B. MorTAL Kombat: The story of  
588 defense against TAL effectors through loss-of-susceptibility. Front Plant Sci. 2015;  
589 6:535. doi:10.3389/fpls.2015.00535 PMID: 26236326
- 590 15. Blanvillain-Baufumé S, Reschke M, Solé M, Auguy F, Doucoure H, Szurek B,  
591 Meynard D, Portefaix M, Cunnac S, Guiderdoni E, Boch J, Koebnik R. Targeted  
592 promoter editing for rice resistance to *Xanthomonas oryzae* pv. *oryzae* reveals  
593 differential activities for *SWEET14*-inducing TAL effectors. Plant Biotechnol J.

- 594 [2017; 15\(3\):306-317. doi:10.1111/pbi.12613 PMID: 27539813](#)
- 595 [16. Zaka A, Grande G, Coronejo T, Quibod IL, Chen CW, Chang SJ, Szurek B, Arif](#)  
596 [M, Cruz CV, Oliva R. Natural variations in the promoter of \*OsSWEET13\* and](#)  
597 [\*OsSWEET14\* expand the range of resistance against \*Xanthomonas oryzae\* pv.](#)  
598 [\*oryzae\*. PLoS One. 2018; 13\(9\):e0203711. doi:10.1371/journal.pone.0203711](#)  
599 [PMID: 30212546](#)
- 600 [17. Huang S, Antony G, Li T, Liu B, Obasa K, Yang B, White FF. The broadly](#)  
601 [effective recessive resistance gene \*xa5\* of rice is a virulence effector-dependent](#)  
602 [quantitative trait for bacterial blight. Plant J. 2016; 86\(2\):186-194.](#)  
603 [doi:10.1111/tpj.13164 PMID: 26991395](#)
- 604 [18. Li J, Li Y, Ma L. CRISPR/Cas9-based genome editing and its applications for](#)  
605 [functional genomic analyses in plants. Small Methods. 2019; 3\(3\):1800473.](#)  
606 [doi:10.1002/smt.201800473 PMID: 27895652](#)
- 607 [19. Van Hop D, Phuong Hoa PT, Quang ND, Ton PH, Ha TH, Van Hung N, et al.](#)  
608 [Biological control of \*Xanthomonas oryzae\* pv. \*oryzae\* causing rice bacterial blight](#)  
609 [disease by \*Streptomyces toxytricini\* VN08-A-12, isolated from soil and leaf-litter](#)  
610 [samples in Vietnam. Biocontrol Sci. 2014; 19\(3\):103-111. doi:10.4265/bio.19.103](#)  
611 [PMID: 25252641](#)
- 612 [20. Furuya N, Taura S, Goto T, Trong Thuy B, Huu Ton P, Tsuchiya K, Yoshimura A.](#)  
613 [Diversity in virulence of \*Xanthomonas oryzae\* pv. \*oryzae\* from Northern Vietnam.](#)

- 614 [Japan Agric Res Q. 2012; 46\(4\):329-338. doi:10.6090/jarq.46.329](#)
- 615 21. Nguyen HT, Vu QH, Van Mai T, Nguyen TT, Vu LD, Nguyen TT, Nguyen LV,  
616 Vu HTT, Nong HT, Dinh TN, Toshitsugu N, Vu LV. Marker-Assisted Selection of  
617 *Xa21* conferring resistance to bacterial leaf blight in indica rice cultivar LT2. Rice  
618 Sci. 2018; 25(1):52-56. doi:10.1016/j.rsci.2017.08.004
- 619 22. Jiang N, Yan J, Liang Y, Shi Y, He Z, Wu Y, Zeng Q, Liu X, Peng J. Resistance  
620 genes and their interactions with bacterial blight/leaf streak pathogens  
621 (*Xanthomonas oryzae*) in rice (*Oryza sativa* L.) - an updated review. Rice. 2020;  
622 13(1):3. doi:10.1186/s12284-019-0358-y PMID: 31915945
- 623 23. Eom JS, Luo D, Atienza-Grande G, Yang J, Ji C, Thi Luu V, Huguet-Tapia JC,  
624 Char SN, Liu B, Nguyen H, Schmidt SM, Szurek B, Vera Cruz C, White FF, Oliva  
625 R, Yang B, Frommer WB. Diagnostic kit for rice blight resistance. Nat Biotechnol.  
626 2019; 37(11):1372-1379. doi:10.1038/s41587-019-0268-y PMID: 31659338
- 627 24. Manh Bao T, Thi Hop T, Thi Tiec T, Thi Nhung N, Van Hoan N. Results of  
628 breeding TBR225 rice cultivar. Vietnam J. Agri. Sci. 2016; 14(9):1360-1367. In  
629 Vietnamese. Available from: [http://www1.vnua.edu.vn/tapchi/Upload/15112016-](http://www1.vnua.edu.vn/tapchi/Upload/15112016-so%208.7.pdf)  
630 [so%208.7.pdf](http://www1.vnua.edu.vn/tapchi/Upload/15112016-so%208.7.pdf)
- 631 25. Zhou J. Host target genes of the *Xanthomonas oryzae* pv . *oryzae* type III effectors  
632 for bacterial blight in rice. Graduate Theses and Dissertations, The Iowa State  
633 University. 2015. Available from:

634 <https://lib.dr.iastate.edu/cgi/viewcontent.cgi?article=5476&context=etd>

635 26. Li T, Huang S, Zhou J, Yang B. Designer TAL effectors induce disease  
636 susceptibility and resistance to *Xanthomonas oryzae* pv. *oryzae* in rice. Mol Plant.  
637 2013; 6(3):781-789. doi:10.1093/mp/sst034 PMID: 23430045

638 27. Herbert L, Meunier AC, Bes M, Vernet A, Portefaix M, Durandet F, Michel R,  
639 Chaine C, This P, Guiderdoni E, Périn C. Beyond seek and destroy: how to  
640 generate allelic series using genome editing tools. Rice. 2020; 13(1):5.  
641 doi:10.1186/s12284-020-0366-y PMID: 31993780

642 28. Zhou H, Liu B, Weeks DP, Spalding MH, Yang B. Large chromosomal deletions  
643 and heritable small genetic changes induced by CRISPR/Cas9 in rice. Nucleic  
644 Acids Res. 2014; 42(17):10903-10914. doi:10.1093/nar/gku806 PMID: 25200087

645 29. Hiei Y, Ohta S, Komari T, Kumashiro T. Efficient transformation of rice (*Oryza*  
646 *sativa* L.) mediated by *Agrobacterium* and sequence analysis of the boundaries of  
647 the T- DNA. Plant J. 1994; 6(2):271-282. doi:10.1046/j.1365-  
648 313X.1994.6020271.x PMID: 7920717

649 30. Bai J, Choi SH, Ponciano G, Leung H, Leach JE. *Xanthomonas oryzae* pv. *oryzae*  
650 avirulence genes contribute differently and specifically to pathogen aggressiveness.  
651 Mol Plant Microbe Interact. 2000; 13(12):1322-1329.  
652 doi:10.1094/MPMI.2000.13.12.1322 PMID: 11106024

653 31. Ma X, Chen L, Zhu Q, Chen Y, Liu YG. Rapid decoding of sequence-specific

Formatted: French (France)

- 654 [nuclease-induced heterozygous and biallelic mutations by direct sequencing of](#)  
655 [PCR products. Mol Plant. 2015; 8\(8\):1285-1287. doi:10.1016/j.molp.2015.02.012](#)  
656 [PMID: 25747846](#)
- 657 [32. Razzaq A, Saleem F, Kanwal M, Mustafa G, Yousaf S, Imran Arshad HM,](#)  
658 [Hameed MK, Khan MS, Joyia FA. Modern trends in plant genome editing: An](#)  
659 [inclusive review of the CRISPR/Cas9 Toolbox. Int J Mol Sci. 2019; 20\(16\):4045.](#)  
660 [doi:10.3390/ijms20164045 PMID: 31430902](#)
- 661 [33. Wang F, Wang C, Liu P, Lei C, Hao W, Gao Y, Liu YG, Zhao K. Enhanced rice](#)  
662 [blast resistance by CRISPR/Cas9-Targeted mutagenesis of the ERF transcription](#)  
663 [factor gene \*OsERF922\*. PLoS One. 2016;11\(4\):e0154027.](#)  
664 [doi:10.1371/journal.pone.0154027 PMID: 27116122](#)
- 665 [34. Zhou H, He M, Li J, Chen L, Huang Z, Zheng S, Zhu L, Ni E, Jiang D, Zhao B,](#)  
666 [Zhuang C. Development of commercial thermo-sensitive genic male sterile rice](#)  
667 [accelerates hybrid rice breeding using the CRISPR/Cas9-mediated TMS5 editing](#)  
668 [system. Sci Rep. 2016; 6:37395. doi:10.1038/srep37395 PMID: 27874087](#)
- 669 [35. Zhang A, Liu Y, Wang F, Li T, Chen Z, Kong D, Bi J, Zhang F, Luo X, Wang J,](#)  
670 [Tang J, Yu X, Liu G, Luo L. Enhanced rice salinity tolerance via CRISPR/Cas9-](#)  
671 [targeted mutagenesis of the \*OsRR22\* gene. Mol Breed. 2019; 39:47.](#)  
672 [doi:10.1007/s11032-019-0954-y PMID: 32803201](#)
- 673 [36. Zafar K, Khan MZ, Amin I, Mukhtar Z, Yasmin S, Arif M, Ejaz K, Mansoor S.](#)

- 674 Precise CRISPR-Cas9 mediated genome editing in super Basmati rice for  
675 resistance against bacterial blight by targeting the major susceptibility gene. Front  
676 Plant Sci. 2020; 11:575. doi:10.3389/fpls.2020.00575 PMID: 32595655
- 677 37. Kim YA, Moon H, Park CJ. CRISPR/Cas9-targeted mutagenesis of *Os8N3* in rice  
678 to confer resistance to *Xanthomonas oryzae* pv. *oryzae*. Rice. 2019; 12(1):67.  
679 doi:10.1186/s12284-019-0325-7 PMID: 31446506 White FF, Potnis N, Jones JB,  
680 Koebnik R. The type III effectors of *Xanthomonas*. Mol Plant Pathol.  
681 2009;10(6):749-766. doi:10.1111/j.1364-3703.2009.00590.x
- 682 3. Boch J, Bonas U, Lahaye T. TAL effectors—pathogen strategies and plant  
683 resistance engineering. New Phytol. 2014;204(4):823-832. doi:10.1111/nph.13015
- 684 4. Bogdanove AJ, Schornack S, Lahaye T. TAL effectors: Finding plant genes for  
685 disease and defense. Curr Opin Plant Biol. 2010;13(4):394-401.  
686 doi:10.1016/j.pbi.2010.04.010
- 687 5. Bezruzezyk M, Yang J, Eom JS, et al. Sugar flux and signaling in plant-microbe  
688 interactions. Plant J. 2018;93(4):675-685. doi:10.1111/tpj.13775
- 689 6. Yang B, Sugio A, White FF. Os8N3 is a host disease susceptibility gene for  
690 bacterial blight of rice. Proc Natl Acad Sci U S A. 2006;103(27):10503-10508.  
691 doi:10.1073/pnas.0604088103
- 692 7. Antony G, Zhou J, Huang S, et al. Rice *xa13* recessive resistance to bacterial blight  
693 is defeated by induction of the disease susceptibility gene *Os11N3*. Plant Cell.



- 694 2010;22(11):3864-3876. doi:10.1105/tpc.110.078964
- 695 ~~8. Yu Y, Streubel J, Balzergue S, et al. Colonization of rice leaf blades by an African~~  
696 ~~strain of xanthomonas oryzae pv. oryzae depends on a new TAL effector that~~  
697 ~~induces the rice nodulin 3-Os11N3 gene. Mol Plant Microbe Interact.~~  
698 ~~2011;24(9):1102-1113. doi:10.1094/MPMI.11.10.0254~~
- 699 ~~9. Streubel J, Pesce C, Hutin M, Koebnik R, Boeh J, Szurek B. Five phylogenetically~~  
700 ~~close rice SWEET genes confer TAL effector mediated susceptibility to~~  
701 ~~Xanthomonas oryzae pv. oryzae. New Phytol. 2013;200(3):808-819.~~  
702 ~~doi:10.1111/nph.12411~~
- 703 ~~10. Zhou J, Peng Z, Long J, et al. Gene targeting by the TAL effector PthXo2 reveals~~  
704 ~~cryptic resistance gene for bacterial blight of rice. Plant J. 2015;82(4):632-643.~~  
705 ~~doi:10.1111/tpj.12838~~
- 706 ~~11. Oliva R, Ji C, Atienza Grande G, et al. Broad spectrum resistance to bacterial~~  
707 ~~blight in rice using genome editing. Nat Biotechnol. 2019;37(11):1344-1350.~~  
708 ~~doi:10.1038/s41587-019-0267-z~~
- 709 ~~12. Xu Z, Xu X, Gong Q, et al. Engineering Broad Spectrum Bacterial Blight~~  
710 ~~Resistance by Simultaneously Disrupting Variable TALE Binding Elements of~~  
711 ~~Multiple Susceptibility Genes in Rice. Mol Plant. 2019;12(11):1434-1446.~~  
712 ~~doi:10.1016/j.molp.2019.08.006~~
- 713 ~~13. Li T, Liu B, Spalding MH, Weeks DP, Yang B. High efficiency TALEN based~~

- 714 ~~gene editing produces disease resistant rice. *Nat Biotechnol.* 2012;30(5):390-392.~~  
715 ~~doi:10.1038/nbt.2199~~
- 716 ~~14. Hutin M, Pérez Quintero AL, Lopez C, Szurek B. MorTAL Kombat: The story of~~  
717 ~~defense against TAL effectors through loss of susceptibility. *Front Plant Sci.*~~  
718 ~~2015;6(JULY). doi:10.3389/fpls.2015.00535~~
- 719 ~~15. Blanvillain-Baufumé S, Resehke M, Solé M, et al. Targeted promoter editing for~~  
720 ~~rice resistance to *Xanthomonas oryzae* pv. *oryzae* reveals differential activities for~~  
721 ~~*SWEET14* inducing TAL effectors. *Plant Biotechnol J.* 2017;15(3):306-317.~~  
722 ~~doi:10.1111/pbi.12613~~
- 723 ~~16. Zaka A, Grande G, Coronejo T, et al. Natural variations in the promoter of~~  
724 ~~OsSWEET13 and OsSWEET14 expand the range of resistance against~~  
725 ~~*Xanthomonas oryzae* pv. *Oryzae*. *PLoS One.* 2018;13(9).~~  
726 ~~doi:10.1371/journal.pone.0203711~~
- 727 ~~17. Huang S, Antony G, Li T, et al. The broadly effective recessive resistance gene *xa5*~~  
728 ~~of rice is a virulence effector dependent quantitative trait for bacterial blight. *Plant*~~  
729 ~~*J.* 2016;86(2):186-194. doi:10.1111/tpj.13164~~
- 730 ~~18. Li J, Li Y, Ma L. CRISPR/Cas9 Based Genome Editing and its Applications for~~  
731 ~~Functional Genomic Analyses in Plants. *Small Methods.* 2019;3(3):1800473.~~  
732 ~~doi:10.1002/smt.201800473~~
- 733 ~~19. Hop D Van, Hoa PTP, Quang ND, et al. Biological control of *Xanthomonas oryzae*~~

- 734 ~~pv. oryzae causing rice bacterial blight disease by Streptomyces toxytricini VN08-~~  
735 ~~A 12, isolated from soil and leaf litter samples in Vietnam. *Biocontrol Sci.*~~  
736 ~~2014;19(3):103-111. doi:10.4265/bio.19.103~~
- 737 ~~20. Furuya N, Taura S, Goto T, et al. Diversity in virulence of *Xanthomonas oryzae* pv.~~  
738 ~~*Oryzae* from Northern Vietnam. *Japan Agric Res Q.* 2012;46(4):329-338.~~  
739 ~~doi:10.6090/jarq.46.329~~
- 740 ~~21. Nguyen HT, Vu QH, Van Mai T, et al. Marker Assisted Selection of Xa21~~  
741 ~~Conferring Resistance to Bacterial Leaf Blight in indica Rice Cultivar LT2. *Rice*~~  
742 ~~*Sci.* 2018;25(1):52-56. doi:10.1016/j.rsci.2017.08.004~~
- 743 ~~22. Jiang N, Yan J, Liang Y, et al. Resistance Genes and their Interactions with~~  
744 ~~Bacterial Blight/Leaf Streak Pathogens (*Xanthomonas oryzae*) in Rice (*Oryza*~~  
745 ~~*sativa* L.) – an Updated Review. *Rice.* 2020;13(1). doi:10.1186/s12284-019-0358-y~~
- 746 ~~23. Eom JS, Luo D, Atienza Grande G, et al. Diagnostic kit for rice blight resistance.~~  
747 ~~*Nat Biotechnol.* 2019;37(11):1372-1379. doi:10.1038/s41587-019-0268-y~~
- 748 ~~24. Mạnh Báo T, Thị Hợp T, Thị Tiệp T, Thị Nhung N, Văn Hoan N. *KẾT QUẢ*~~  
749 ~~*CHỌN TẠO GIỐNG LÚA TBR225.* Vol 14.; 2016. Accessed October 13, 2020.~~  
750 ~~www.vnua.edu.vn~~
- 751 ~~25. Zhou J, Yang B. Host target genes of the *Xanthomonas oryzae* pv. *oryzae* type III~~  
752 ~~effectors for bacterial blight in rice. Published online 2015.~~
- 753 ~~26. Li T, Huang S, Zhou J, Yang B. Designer TAL effectors induce disease~~

- 754 susceptibility and resistance to *Xanthomonas oryzae* pv. *oryzae* in rice. *Mol Plant*.  
755 2013;6(3):781-789. doi:10.1093/mp/sst034
- 756 27. Herbert L, Meunier AC, Bes M, et al. Beyond Seek and Destroy: how to Generate  
757 Allelic Series Using Genome Editing Tools. *Rice*. 2020;13(1). doi:10.1186/s12284-  
758 020-0366-y
- 759 28. Zhou H, Liu B, Weeks DP, Spalding MH, Yang B. Large chromosomal deletions  
760 and heritable small genetic changes induced by CRISPR/Cas9 in rice. *Nucleic*  
761 *Acids Res*. 2014;42(17):10903-10914. doi:10.1093/nar/gku806
- 762 29. Hiei Y, Ohta S, Komari T, Kumashiro T. Efficient transformation of rice (*Oryza*  
763 *sativa* L.) mediated by *Agrobacterium* and sequence analysis of the boundaries of  
764 the T-DNA. *Plant J*. 1994;6(2):271-282. doi:10.1046/j.1365-  
765 313X.1994.6020271.x
- 766 30. Bai J, Choi SH, Ponciano G, Leung H, Leach JE. *Xanthomonas oryzae* pv. *oryzae*  
767 avirulence genes contribute differently and specifically to pathogen aggressiveness.  
768 *Mol Plant Microbe Interact*. 2000;13(12):1322-1329.  
769 doi:10.1094/MPMI.2000.13.12.1322
- 770 31. Ma X, Chen L, Zhu Q, Chen Y, Liu YG. Rapid Decoding of Sequence Specific  
771 Nuclease Induced Heterozygous and Biallelic Mutations by Direct Sequencing of  
772 PCR Products. *Mol Plant*. 2015;8(8):1285-1287. doi:10.1016/j.molp.2015.02.012
- 773 32. Razzaq A, Saleem F, Kanwal M, et al. Modern trends in plant genome editing: An

- 774 ~~inclusive review of the CRISPR/Cas9 Toolbox. *Int J Mol Sci.* 2019;20(16).~~  
775 ~~doi:10.3390/ijms20164045~~
- 776 33. ~~Wang F, Wang C, Liu P, et al. Enhanced rice blast resistance by CRISPR/ Cas9~~  
777 ~~Targeted mutagenesis of the ERF transcription factor gene OsERF922~~  
778 ~~Supplementary data. *PLoS One.* 2016;11(4). doi:10.1371/journal.pone.0154027~~
- 779 34. ~~Zhou H, He M, Li J, et al. Development of Commercial Thermo-sensitive Genie~~  
780 ~~Male Sterile Rice Accelerates Hybrid Rice Breeding Using the CRISPR/Cas9~~  
781 ~~mediated TMS5 Editing System. *Sci Rep.* 2016;6. doi:10.1038/srep37395~~
- 782 35. ~~Zhang A, Liu Y, Wang F, et al. Enhanced rice salinity tolerance via CRISPR/Cas9~~  
783 ~~targeted mutagenesis of the OsRR22 gene. *Mol Breed.* 2019;39(3).~~  
784 ~~doi:10.1007/s11032-019-0954-y~~
- 785 36. ~~Zafar K, Khan MZ, Amin I, et al. Precise CRISPR-Cas9 Mediated Genome Editing~~  
786 ~~in Super Basmati Rice for Resistance Against Bacterial Blight by Targeting the~~  
787 ~~Major Susceptibility Gene. *Front Plant Sci.* 2020;11. doi:10.3389/fpls.2020.00575~~
- 788 37. ~~Kim YA, Moon H, Park CJ. CRISPR/Cas9 targeted mutagenesis of Os8N3 in rice~~  
789 ~~to confer resistance to *Xanthomonas oryzae* pv. *oryzae*. *Rice.* 2019;12(1).~~  
790 ~~doi:10.1186/s12284-019-0325-7~~
- 791 38. Molla KA, Shih J, Yang Y. Single-nucleotide editing for zebra3 and wsl5  
792 phenotypes in rice using CRISPR/Cas9-mediated adenine base editors.  
793 *aBIOTECH.* 2020;1(2):106-118. doi:10.1007/s42994-020-00018-x

- 794 39. [Chen LQ. SWEET sugar transporters for phloem transport and pathogen nutrition.](#)  
795 [New Phytol. 2014; 201\(4\):1150-1155. doi:10.1111/nph.12445 PMID:](#)  
796 [24649486](#)~~Chen LQ. SWEET sugar transporters for phloem transport and pathogen~~  
797 ~~nutrition. *New Phytol.* 2014;201(4):1150-1155. doi:10.1111/nph.12445~~
- 798 40. [Yang J, Luo D, Yang B, Frommer WB, Eom JS. SWEET11 and 15 as key players](#)  
799 [in seed filling in rice. \*New Phytol.\* 2018; 218\(2\):604-615. doi:10.1111/nph.15004](#)  
800 [PMID: 29393510](#)~~Yang J, Luo D, Yang B, Frommer WB, Eom JS. SWEET11 and~~  
801 ~~15 as key players in seed filling in rice. *New Phytol.* 2018;218(2):604-615.~~  
802 ~~doi:10.1111/nph.15004~~
- 803 41. [Doucouré H, Pérez-Quintero AL, Reshetnyak G, Tekete C, Auguy F, Thomas E,](#)  
804 [Koebnik R, Szurek B, Koita O, Verdier V, Cunnac S. Functional and genome](#)  
805 [sequence-driven characterization of \*tal\* effector gene repertoires reveals novel](#)  
806 [variants with altered specificities in closely related malian \*Xanthomonas oryzae\* pv.](#)  
807 [\*oryzae\* strains. \*Front Microbiol.\* 2018; 9:1657. doi:10.3389/fmicb.2018.01657](#)  
808 [PMID: 30127769](#)~~Doucouré H, Pérez-Quintero AL, Reshetnyak G, et al. Functional~~  
809 ~~and genome sequence driven characterization of *tal* effector gene repertoires~~  
810 ~~reveals novel variants with altered specificities in closely related malian~~  
811 ~~*Xanthomonas oryzae* pv. *oryzae* strains. *Front Microbiol.* 2018;9(AUG).~~  
812 ~~doi:10.3389/fmicb.2018.01657~~
- 813 42. [Chu Z, Yuan M, Yao J, Ge X, Yuan B, Xu C, Li X, Fu B, Li Z, Bennetzen JL,](#)  
814 [Zhang Q, Wang S. Promoter mutations of an essential gene for pollen development](#)

815 [result in disease resistance in rice. \*Genes Dev.\* 2006; 20\(10\):1250-1255.](#)

816 [doi:10.1101/gad.1416306 PMID: 16648463](#) ~~Chu Z, Yuan M, Yao J, et al. Promoter~~

817 ~~mutations of an essential gene for pollen development result in disease resistance in~~

818 ~~rice. *Genes Dev.* 2006;20(10):1250-1255. doi:10.1101/gad.1416306~~

819 43. Pérez-Quintero AL, Rodríguez-R LM, Dereeper A, [López C, Koebnik R, Szurek B,](#)

820 [Cunnac Set al.](#) An Improved Method for TAL Effectors DNA-Binding Sites

821 Prediction Reveals Functional Convergence in TAL Repertoires of *Xanthomonas*

822 *oryzae* Strains. *PLoS One.* 2013; 8(7):68464. doi:10.1371/journal.pone.0068464

823 [PMID: 23869221](#)

824

825

Formatted: Font: Not Italic, Not Superscript/ Subscript

826 **Supporting information**

827 **S1\_raw\_images. Original photograph used in Fig 2 for the RT-PCR gels panel.**

828 **S2\_raw\_images. Original photograph used in Fig 3C for the RT-PCR gels panel.**

829 **S1 Fig. Nucleotide sequence of the *OsSEET14* promoter in TBR225.**

830 **S2 Fig. Virulence of Vietnamese *Xoo* strains VXO\_11 and VXO\_15 on TBR225 rice.**

831 Grey points correspond to individual lesion length measurements while the black points  
832 indicate the calculated average value. The line range represents standard deviation.

833 **S3 Fig. Picture of an individual plant from the homozygous mutant rice lines L-5.7(-  
834 6).**

835 **S4 Fig. Talvez scoring of AvrXa7, PthXo3 and TalF target EBES in the edited  
836 *OsSWEET14* promoter allele sequences. Score values are represented both by the  
837 length of the a horizontalhorizontal -bar and a fill color scale. Higher Talvez prediction  
838 scores reflect a better match between a predicted EBE and the sequence of RVD of the  
839 query TALE.**

840 **S5 Fig. S65 Fig. DNA Amplicon sequencing analysis of predicted off-target sites for  
841 the *OsSWEET14* promoter-sgRNA in annotated exons of the TBR225 edited line L-  
842 5.7(-6). Potential unintended target sequences including the PAM Off target sequences  
843 are ~~were showed~~highlighted -in the boxes. They are all identical to the expected wild type  
844 Nipponbare sequences.**

**Formatted:** Font color: Auto, Not Superscript/ Subscript

**Formatted:** Font: Italic, Font color: Auto, Not Superscript/ Subscript

**Formatted:** Font: Not Bold, Not Superscript/ Subscript

**Formatted:** Font: Not Bold, Font color: Auto, Not Superscript/ Subscript



845

Formatted: Font: Not Bold

846

**S1 Table. Key figures on the TBR225 transformation procedure for *OsSWEET14***

847

**promoter editing.**

848

**S2 Table. Output of the CCTop tool used with the *OsSWEET14* promoter sgRNA**

Formatted: Font: Bold, Not Superscript/ Subscript

849

**for off-target prediction on the rice Nipponbare genome, ~~Off-target sequences of~~**

Formatted: Font: Bold

Formatted: Font: Bold

850

***OsSWEET14*-sgRNA**

Formatted: Font color: Auto

Formatted: Font: Bold

Formatted: Font: Italic, Font color: Auto

851

852

853

**RESPONSE TO REVIEWERS**

You will find below the itemized list of our replies to the comments made about our re-submission.

**Review Comments to the Author****Reviewer #1**

|   | <b>Reviewer's Comments</b>                                                                                                                                                                                                                                                                                                                                                                                                                                                                                                                                                                                                                                                                                                                                                                                                                                                         | <b>Responses</b>                                                                                                                                                                                                                                                                                                                                                                                                                                                                                                                                                                                                            |
|---|------------------------------------------------------------------------------------------------------------------------------------------------------------------------------------------------------------------------------------------------------------------------------------------------------------------------------------------------------------------------------------------------------------------------------------------------------------------------------------------------------------------------------------------------------------------------------------------------------------------------------------------------------------------------------------------------------------------------------------------------------------------------------------------------------------------------------------------------------------------------------------|-----------------------------------------------------------------------------------------------------------------------------------------------------------------------------------------------------------------------------------------------------------------------------------------------------------------------------------------------------------------------------------------------------------------------------------------------------------------------------------------------------------------------------------------------------------------------------------------------------------------------------|
| 1 | <p>Though there are still some discrepancies that could have improved the manuscript, authors have adequately justified those. For example, they assume that 6 base pair deletion in the promoter region can make a difference in TALE binding but not in gene expression or induction of expression. While working on a promoter editing, it is generally expected to check the expression pattern of the gene under normal and infested condition after editing. Since they did not find any difference in phenotype and it was probably difficult to conduct the experiment, they have avoided the experiment.</p> <p>Authors claim in the conclusion that the study uncovered potential diversity of TALEs. Though the discussion made by authors indicate towards it, they have not done any experiment to verify that. Hence the statement must be modified accordingly.</p> | <p>As also described in our response to comment #3 of Reviewer 2, we have performed the experiment recommended by the reviewers and the results have been integrated in this version of the manuscript (Figure 3C and results section). We believe that this new data (loss of <i>OsSWEET14</i> expression in response to both VXO_11 and VXO_15) brings more indirect support to our hypothesis that VXO_15 encodes additional TALE(s) capable of targeting other <i>OsSWEET</i> genes. We modified the discussion to accommodate this new data and rephrased this section to attenuate the strength of our statement.</p> |
| 2 | <p>Though most of the grammatical errors have been rectified still there are some errors as mentioned below:</p> <ul style="list-style-type: none"> <li>- Ln 33: 'All examined agronomic traits of three transgene-free T2 lines were not significantly different from those of wild-type TBR225' may read as 'None of the examined agronomic traits of three transgene-free T2 lines were significantly different from those of wild-type TBR225'</li> <li>- Ln 67: recessive resistance? – I pointed</li> </ul>                                                                                                                                                                                                                                                                                                                                                                  | <ul style="list-style-type: none"> <li>- This was revised as suggested by the Reviewer</li> </ul>                                                                                                                                                                                                                                                                                                                                                                                                                                                                                                                           |

|  |                                                                                                                                                                                                                                                                                                                                  |                                                                                                                                                 |
|--|----------------------------------------------------------------------------------------------------------------------------------------------------------------------------------------------------------------------------------------------------------------------------------------------------------------------------------|-------------------------------------------------------------------------------------------------------------------------------------------------|
|  | <p>it earlier, but the explanation was more confusing and must be addressed</p> <ul style="list-style-type: none"> <li>- Ln 381: The single nucleotide mutation was observed only in two of nine plants. So the type of mutation should be only insertion or deletion but not single nucleotide insertion or deletion</li> </ul> | <ul style="list-style-type: none"> <li>- This was revised as “resistance”</li> <li>- This was corrected as suggested by the Reviewer</li> </ul> |
|--|----------------------------------------------------------------------------------------------------------------------------------------------------------------------------------------------------------------------------------------------------------------------------------------------------------------------------------|-------------------------------------------------------------------------------------------------------------------------------------------------|

**Reviewer #2**

|   | <b>Reviewer’s Comments</b>                                                                                                                                                                                                                                                                                                                                                                                                                                                                                                                                                                                                                                                                                                                                                                                                                                                                                                                                                                              | <b>Responses</b>                                                                                                                                                                                                                                                                                                                                                                                                                                                                                                                                                                                                                                                                                                                                                                                                                                                                                                                                                                                                                                                                                                                                                                                                                                                                                                   |
|---|---------------------------------------------------------------------------------------------------------------------------------------------------------------------------------------------------------------------------------------------------------------------------------------------------------------------------------------------------------------------------------------------------------------------------------------------------------------------------------------------------------------------------------------------------------------------------------------------------------------------------------------------------------------------------------------------------------------------------------------------------------------------------------------------------------------------------------------------------------------------------------------------------------------------------------------------------------------------------------------------------------|--------------------------------------------------------------------------------------------------------------------------------------------------------------------------------------------------------------------------------------------------------------------------------------------------------------------------------------------------------------------------------------------------------------------------------------------------------------------------------------------------------------------------------------------------------------------------------------------------------------------------------------------------------------------------------------------------------------------------------------------------------------------------------------------------------------------------------------------------------------------------------------------------------------------------------------------------------------------------------------------------------------------------------------------------------------------------------------------------------------------------------------------------------------------------------------------------------------------------------------------------------------------------------------------------------------------|
| 1 | <p>1. The reply to my comment 3 is not satisfactory scientifically. If authors need to back their gene selection in a rational way, they should cite earlier paper that described Asian strains target <i>SWEET14</i> or <i>SWEET13</i>. For easy reference see below my comment and author’s response-</p> <p>My original comment 3: I am wondering if Vietnamese Xoo VXO_11 and VXO_15 strains are known to secrete AvrXa7/PthXo3 from any earlier studies. If not, then how the authors have selected <i>SWEET14</i> for expression analysis and then editing the EBEs? How the authors hypothesized that <i>SWEET14</i> is the probable target <i>S</i> gene for Xoo VXO_11 and VXO_15 strains?</p> <p>Authors replied: As thoughtfully pointed out by the reviewer below, based on previous studies, we knew that Asian strains tend to target either <i>OsSWEET14</i> or <i>OsSWEET13</i>. So, we just tested <i>OsSWEET14</i> induction and were very lucky it turned to be the good choice.</p> | <p>We apologize if we do not fully grasp the point of the reviewer. Candidate gene selection could in principle be entirely random and still yield scientifically sound and serendipitous results in the end. Nevertheless, we believe we provide a reasonable rationale for why focus on <i>OsSWEET14</i>:</p> <ul style="list-style-type: none"> <li>- in the introduction, we comment on the specificity of <i>OsSWEET</i> gene targeting by Asian strains in the paragraph "Previous studies established that rice resistance to <i>Xoo</i> resulting from "TALE-unresponsive" alleles can be conferred by natural DNA polymorphisms [...] BLB resistance engineering thus required multiplex <i>OsSWEET</i> promoters EBE editing using the CRISPR/Cas9 system [11,12]." and extensively cite the literature that previously addressed this issue.</li> <li>- we begin the result section with this sentence "<i>OsSWEET14/Os11N3</i> was previously identified as a susceptibility gene for <i>Xoo</i> strains relying on either of the AvrXa7, PthXo3, TalF (formerly Tal5) or TalC TALEs for infection of the rice cultivars Nipponbare and Kitaake". We modified the following sentence to say that because it is often targeted by Xoo strains, we focused our initial work on this promoter.</li> </ul> |
| 2 | <p>Figure caption: S4: Explain a bit more about TALVEZ scoring for making it easy for the</p>                                                                                                                                                                                                                                                                                                                                                                                                                                                                                                                                                                                                                                                                                                                                                                                                                                                                                                           | <p>We added a sentence in the Figure legend briefly explaining the nature of the Talvez score and making it</p>                                                                                                                                                                                                                                                                                                                                                                                                                                                                                                                                                                                                                                                                                                                                                                                                                                                                                                                                                                                                                                                                                                                                                                                                    |

|   |                                                                                                                                                                                                                                                                                                                                                                                                                                                                                                                                                                                                                                                                                                                                                                                                                                                                                                                                                                                                                                                                                                                                                                                                                                                                                                                                         |                                                                                                                                                                                                                                                                                                                                                                                                                                                                      |
|---|-----------------------------------------------------------------------------------------------------------------------------------------------------------------------------------------------------------------------------------------------------------------------------------------------------------------------------------------------------------------------------------------------------------------------------------------------------------------------------------------------------------------------------------------------------------------------------------------------------------------------------------------------------------------------------------------------------------------------------------------------------------------------------------------------------------------------------------------------------------------------------------------------------------------------------------------------------------------------------------------------------------------------------------------------------------------------------------------------------------------------------------------------------------------------------------------------------------------------------------------------------------------------------------------------------------------------------------------|----------------------------------------------------------------------------------------------------------------------------------------------------------------------------------------------------------------------------------------------------------------------------------------------------------------------------------------------------------------------------------------------------------------------------------------------------------------------|
|   | readers                                                                                                                                                                                                                                                                                                                                                                                                                                                                                                                                                                                                                                                                                                                                                                                                                                                                                                                                                                                                                                                                                                                                                                                                                                                                                                                                 | clear that it increases with the likeliness of a candidate EBE being a genuine target based on the RVD-nucleotide association code.                                                                                                                                                                                                                                                                                                                                  |
| 3 | <p>Similarly, reply to my original comment 6 is not satisfactory. It is not understood why authors are reluctant to perform expression analysis. This experiment needs to be done, otherwise the manuscript looks like a substandard one.</p> <p>Original comment 6: For another line of confirmation, expression analysis of SWEET14 gene from the edited lines (before/after infection) would be a great addition. Authors discussed “This incomplete resistance could result from the partial but still productive recognition of subsequences of the altered EBE by a VXO_15 AvrXa7/PthXo3-like TALE.” This could be simply analysed by expression analysis in the edited line.</p> <p>Authors replied: We agree that examining OsSWEET14 expression in the edited lines would help decide between possible explanations for the partial resistance phenotype against VXO_15. As described in our reply to Reviewer 1's comment #1, we however believe this is beyond the scope of the core results of our study. To tackle this issue, we are in the process of generating the resources to obtain a good vision of the tal genes content of some VXO strains (including VXO_11 and VXO_15). This and the suggested expression assays will be part of a follow up study focusing on the mechanisms explaining these phenotypes</p> | <p>At the reviewers' request, we have performed additional experiments and have included this data in a new panel of Figure 3. The corresponding <i>OsSWEET14</i> expression data in the parent and edited lines following Vietnamese strains inoculation is consistent with the interpretation that only the most dramatic 6bp deletion in the AvrXa7 EBE abrogates <i>OsSWEET14</i> upregulation and causes resistance to the examined Vietnamese Xoo strains.</p> |

|   |                                                                                                                                                                                                                                                                                                                                                                                                                                                                                                                                                                                                                                                                                                                                                                       |                                                                                                                                                                                                                                                                                                                                                                                                                                                                     |
|---|-----------------------------------------------------------------------------------------------------------------------------------------------------------------------------------------------------------------------------------------------------------------------------------------------------------------------------------------------------------------------------------------------------------------------------------------------------------------------------------------------------------------------------------------------------------------------------------------------------------------------------------------------------------------------------------------------------------------------------------------------------------------------|---------------------------------------------------------------------------------------------------------------------------------------------------------------------------------------------------------------------------------------------------------------------------------------------------------------------------------------------------------------------------------------------------------------------------------------------------------------------|
| 4 | <p>Authors have not performed off-target analysis even for revised manuscript. Which is a standard practice for performing CRISPR-Cas9 experiment. Authors used a single guide and analyzing off-targets for a single guide is an easy task</p>                                                                                                                                                                                                                                                                                                                                                                                                                                                                                                                       | <p>At the reviewer's request, we have performed off-target sites predictions with the sequence of the gRNA used for editing and selected three likely potential unintended target sites located in annotated exons for PCR amplicon sequencing with genomic DNA from the resistant L-5.7(-6) line. This analysis did not detect genome modifications and the results were included in the new version of the manuscript (Table S2, Figure S5, results section).</p> |
| 5 | <p>Authors have not taken care of the following original comment in their discussion in the revised manuscript. Line number 382-390 in the revised manuscript.</p> <p>Original comment: other 5: Line 347-349: See the discussion of an earlier publication (<a href="https://doi.org/10.1007/s42994-020-00018-x">https://doi.org/10.1007/s42994-020-00018-x</a>).</p> <p>The authors may cite and take help from the paper to discuss additional mutations in T1 generation.</p> <p>In the Page 116 of the suggested paper, it is discussed “Plants descendent from mutants generated by active Cas9 are prone to further rounds of editing until the PAM and seed region of protospacer are destroyed by editing.” Please also discuss your result in this line</p> | <p>We have added this reference to the list of papers we previously cited in this section of the discussion and have revised our sentence to convey the notion suggested by the reviewer.</p>                                                                                                                                                                                                                                                                       |
